# Supplementary material for: Efficacy and Safety of Astragalus-Containing Traditional Chinese Medicine Combined With Platinum-Based Chemotherapy in Advanced Gastric Cancer: A Systematic Review and Meta-Analysis
Source: PubMed Central journal article supplement (PMC8371531; doi:10.3389/fonc.2021.632168), 2021-08-04
Supplement: DataSheet_1.pdf [file DataSheet_1.pdf]

## *Supplementary Material*

### **1 Supplementary Data**

#### **Search Strategy Used in Pubmed 2020/7/19**

#1 Stomach Neoplasms [Mesh]

#2 (gastr\*[Title/Abstract] OR stomach\*[Title/Abstract] OR digest\*[Title/Abstract] OR epigastr\*[Title/Abstract]) AND (carcin\*[Title/Abstract] OR cancer\*[Title/Abstract] OR neoplas\*[Title/Abstract] OR tumour\*[Title/Abstract] OR tumor\*[Title/Abstract] OR growth\*[Title/Abstract] OR adenocarcin\*[Title/Abstract] OR malig\*[Title/Abstract])

#3 #1 OR #2

#4 Astragalus propinquus [Mesh]

#5 "astragalus"[Text Word] OR "radix astragali"[Text Word] OR "huang qi"[Text Word] OR "huangqi"[Text Word]

#6 kangai[Title/Abstract] OR kang-ai[Title/Abstract] OR aidi[Title/Abstract] OR ai-di[Title/Abstract] OR shenqi\*[Title/Abstract] OR delisheng[Title/Abstract] OR de-li-sheng[Title/Abstract] OR qizhen[Title/Abstract] OR boerning[Title/Abstract] OR compound banmao[Title/Abstract] OR zhenqi[Title/Abstract] OR yangzheng xiaoji[Title/Abstract] OR qijiao shengbai[Title/Abstract] OR lianqi[Title/Abstract] OR cidan [Title/Abstract] OR compound tianxian[Title/Abstract] OR buzhong yiqi[Title/Abstract] OR shiquan dabu[Title/Abstract] OR guipi[Title/Abstract] OR renshen yangrong[Title/Abstract] OR danggui buxue[Title/Abstract]

#7 #4 OR #5 OR #6

#8 #3 AND #7

### **2 Supplementary Figures and Tables**

#### **2.1 Supplementary Figures**

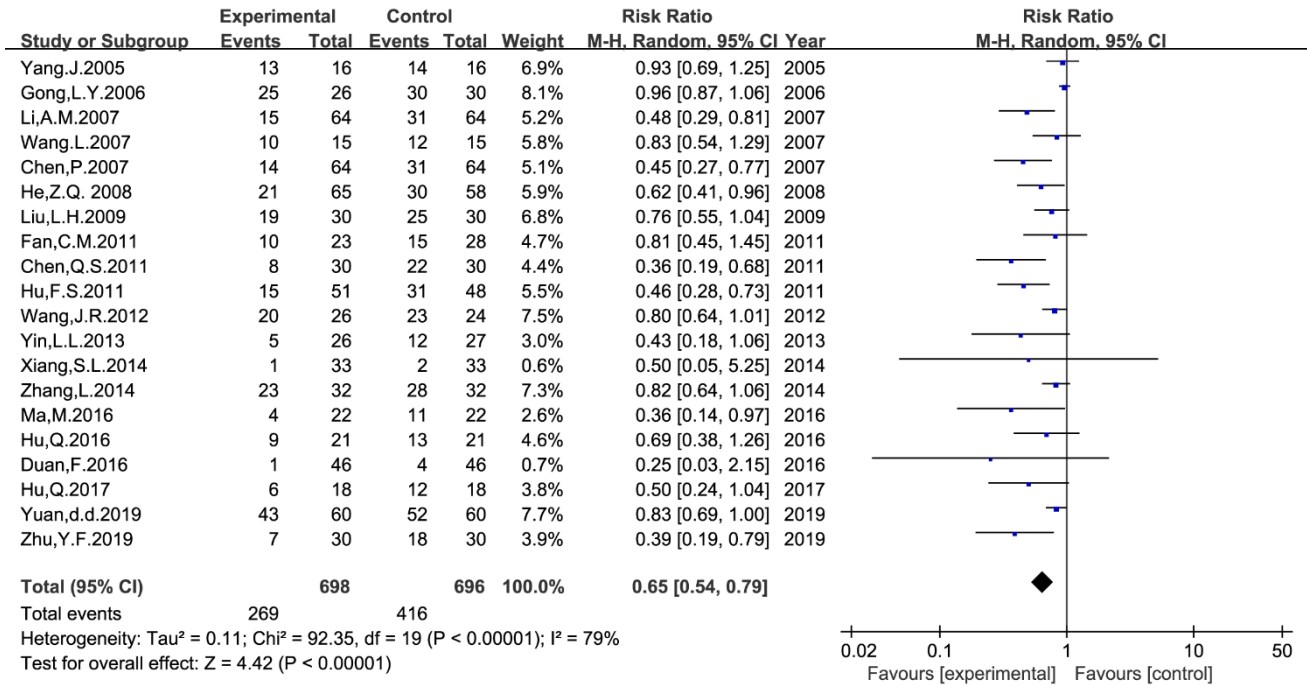

Figure S1. Meta-analysis results of neutropenia between the two groups

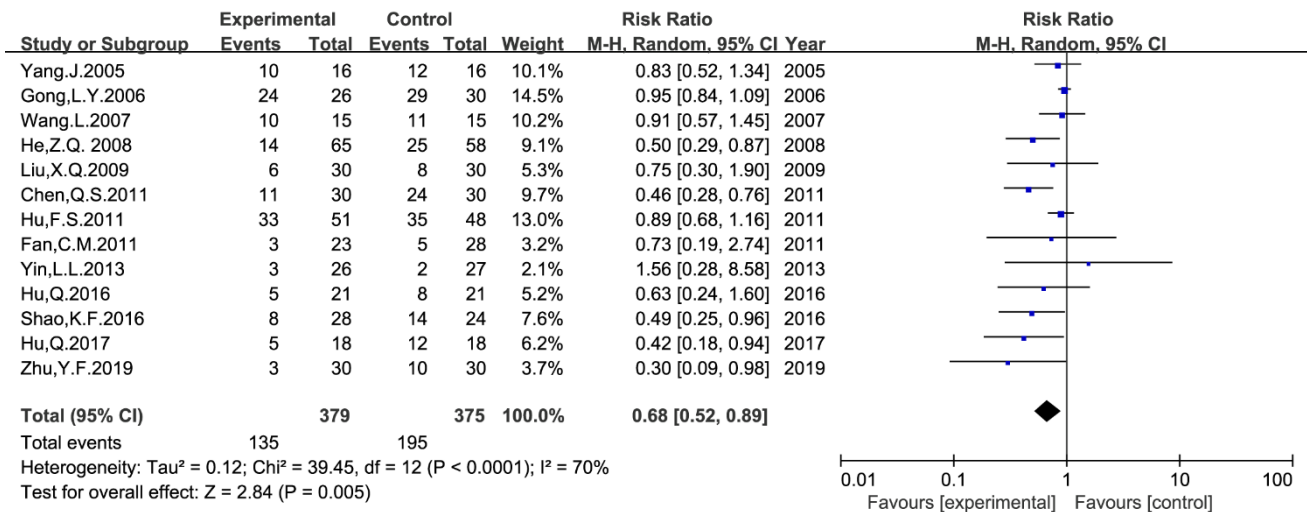

Figure S2. Meta-analysis results of anemia between the two groups

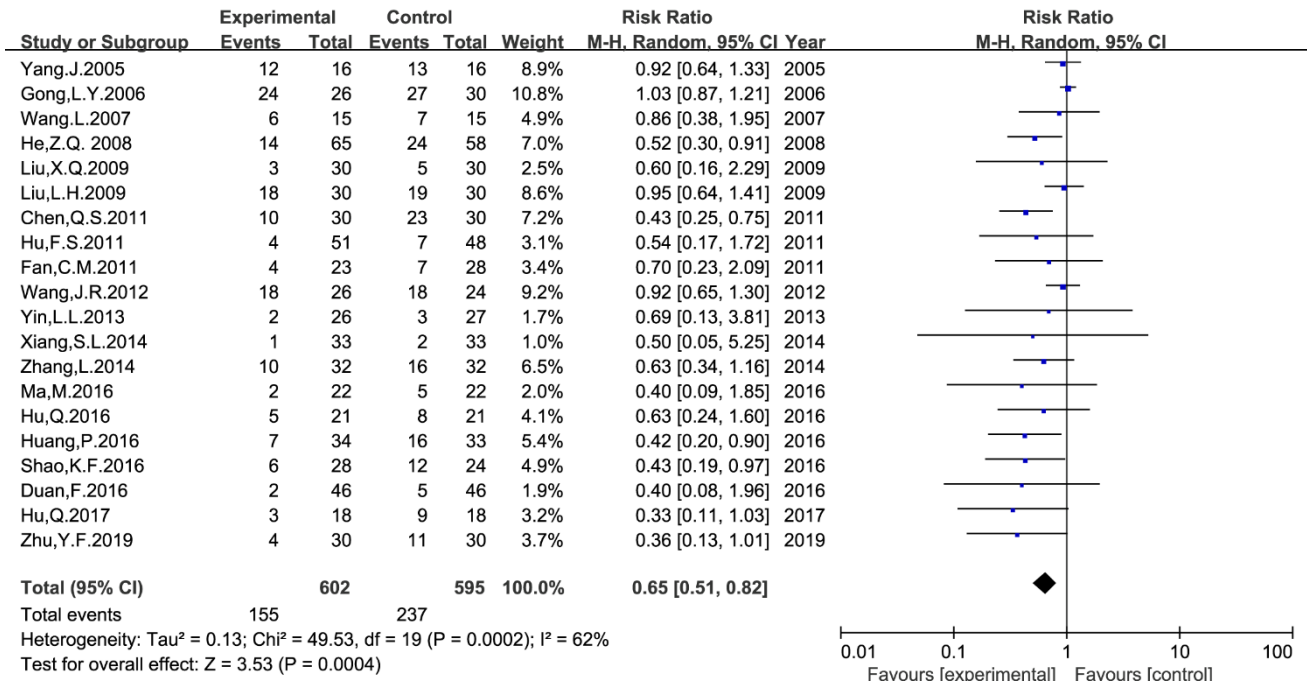

**Figure S3. Meta-analysis results of thrombocytopenia between the two groups**

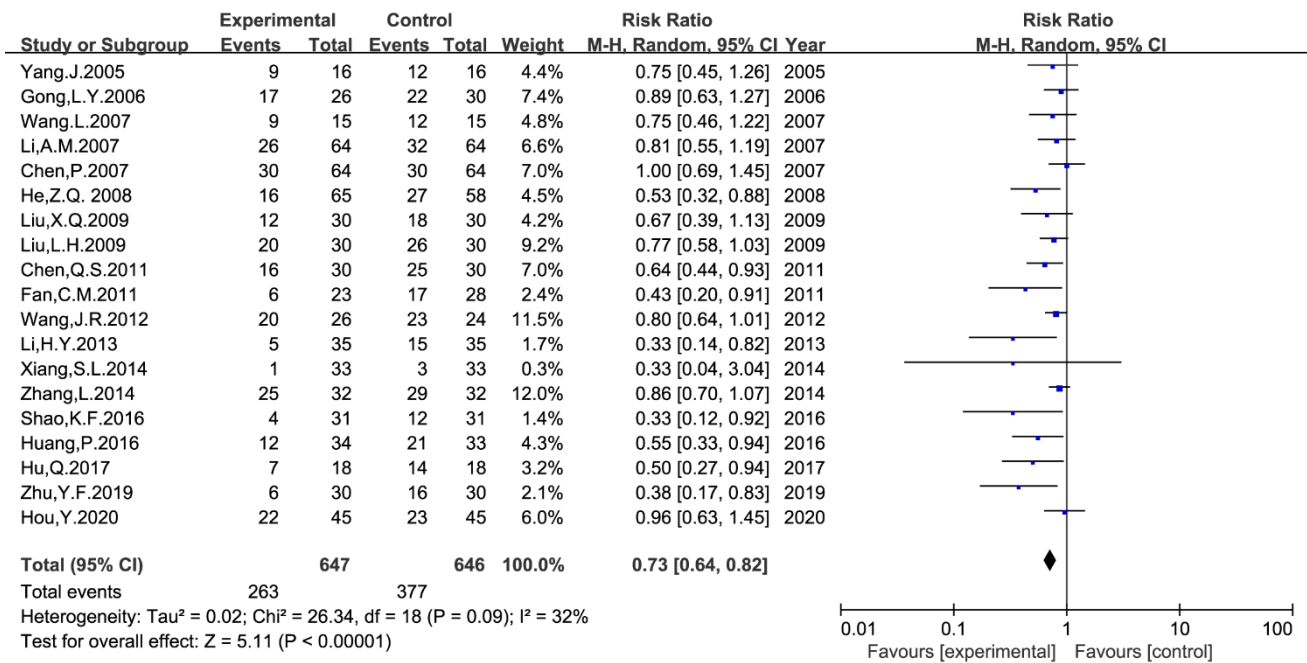

**Figure S4. Meta-analysis results of nausea and vomiting between the two groups**

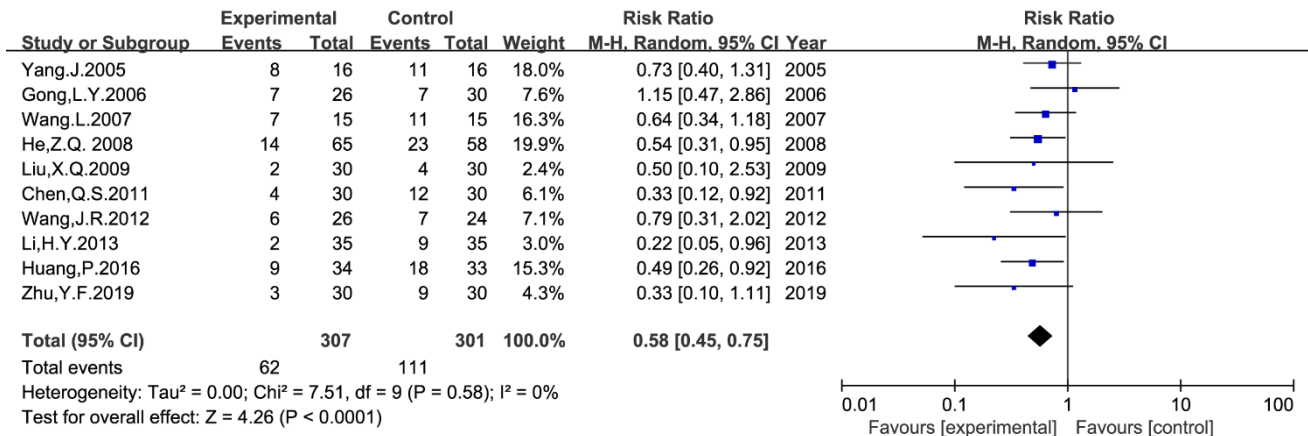

Figure S5. Meta-analysis results of diarrhea between the two groups

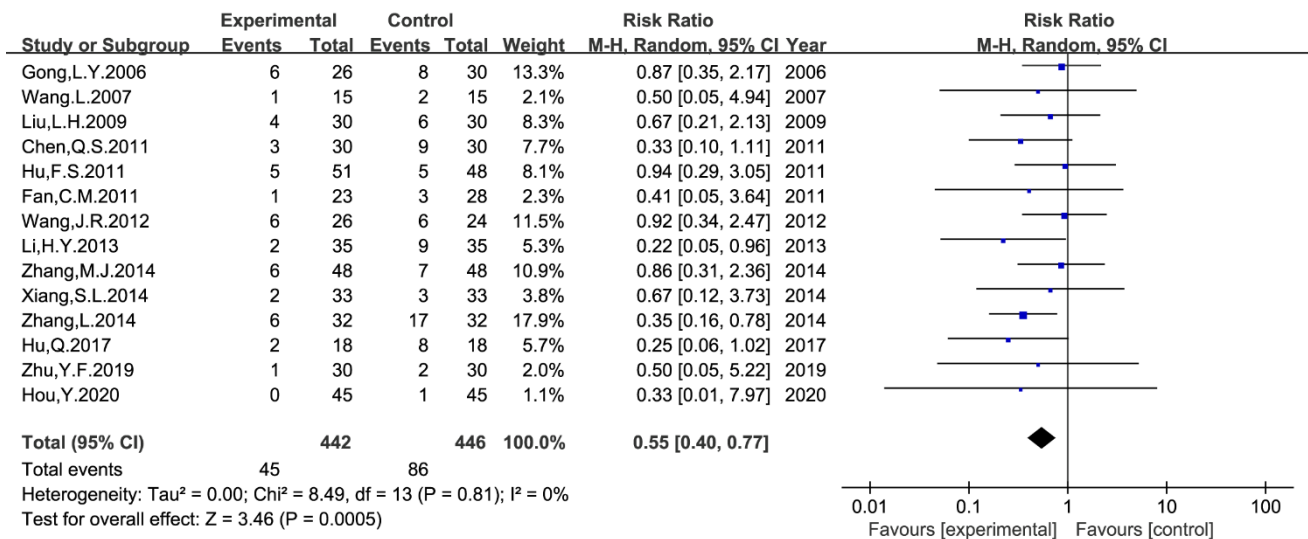

Figure S6. Meta-analysis results of hepatic dysfunction between the two groups

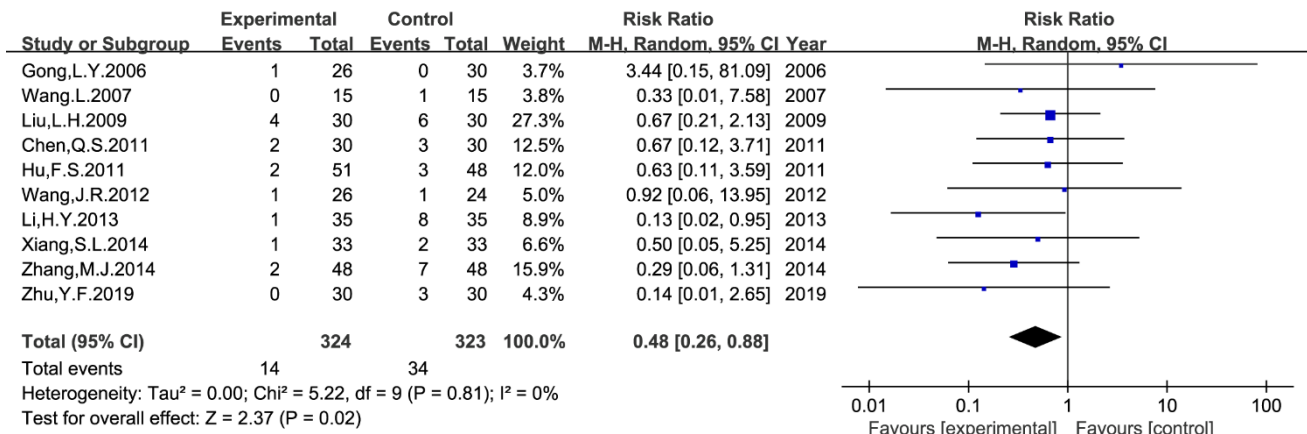

**Figure S7. Meta-analysis results of renal dysfunction between the two groups**

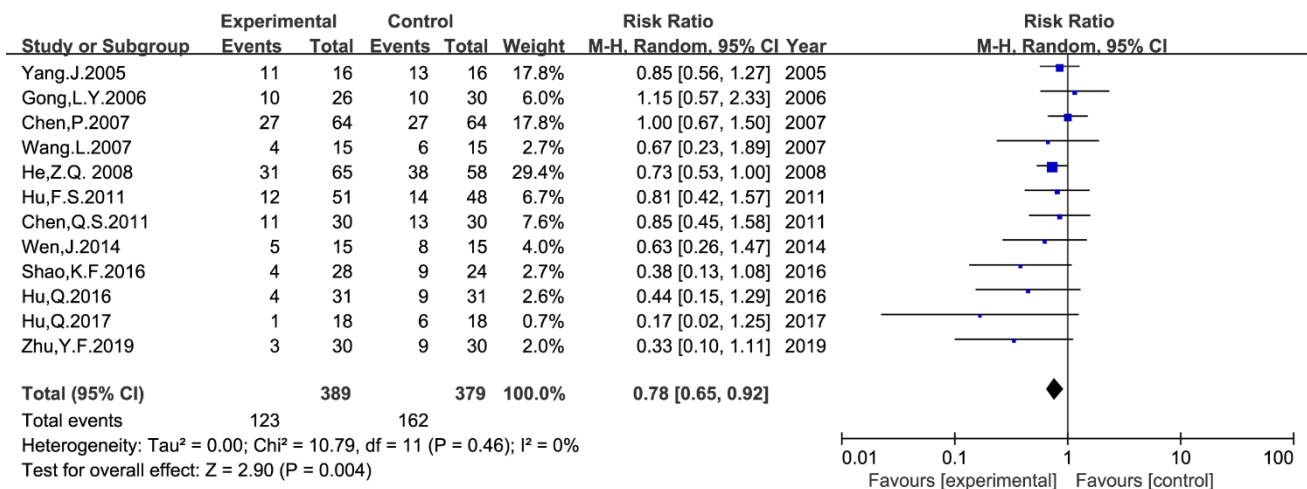

**Figure S8. Meta-analysis results of neurotoxicity between the two groups**

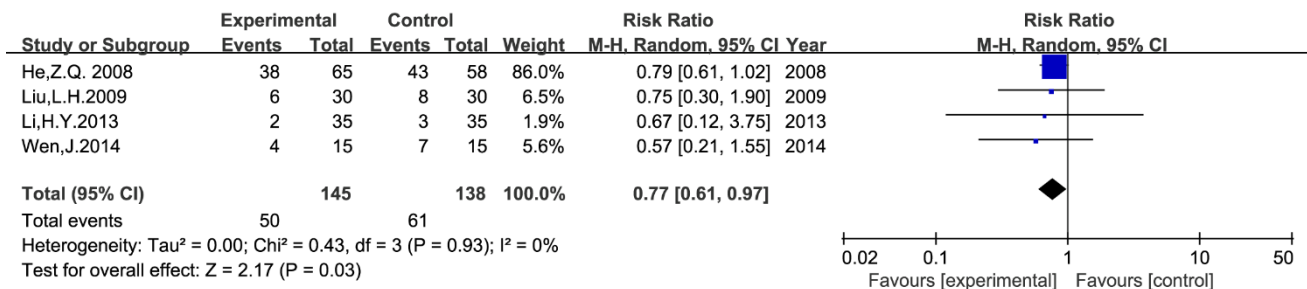

**Figure S9. Meta-analysis results of alopecia between the two groups**

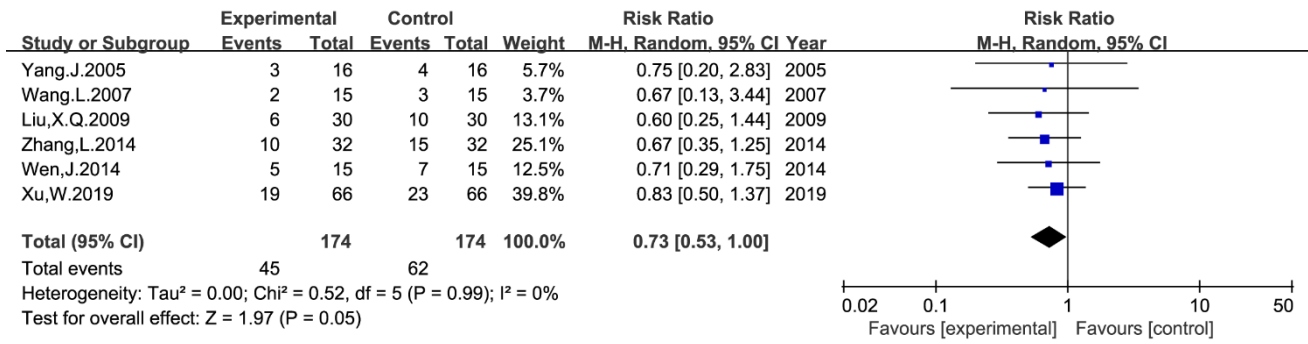

**Figure S10. Meta-analysis results of stomatitis between the two groups**

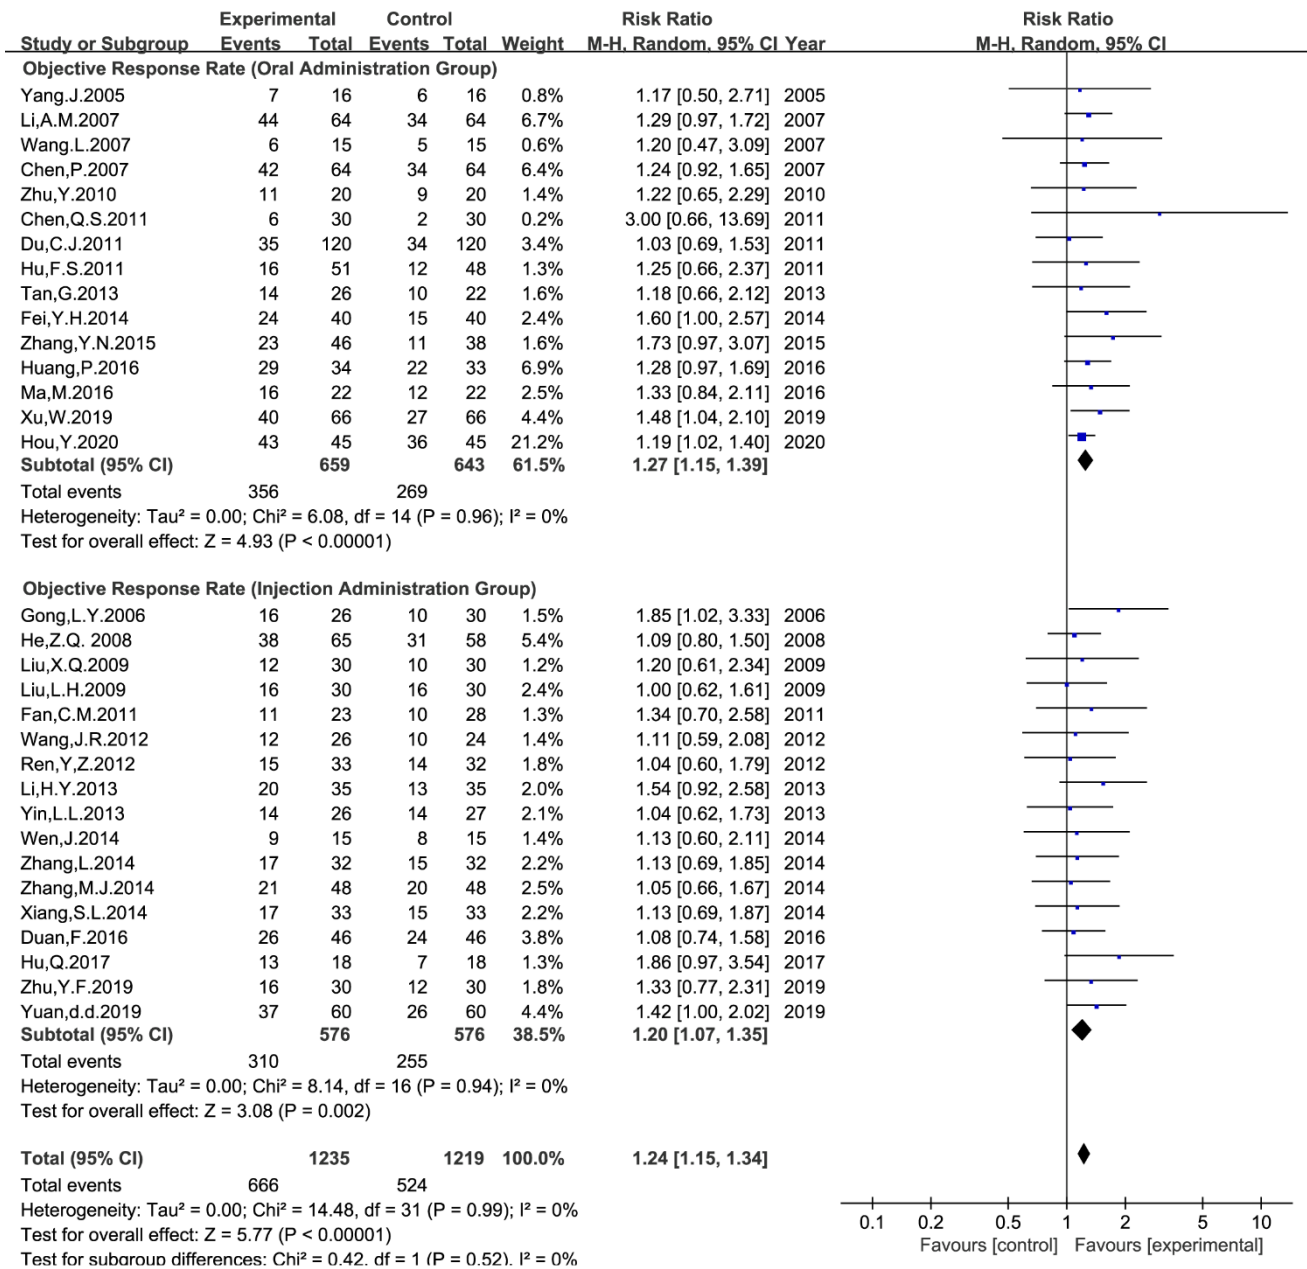

**Figure S11. Subgroup analysis of ORR via drug delivery**



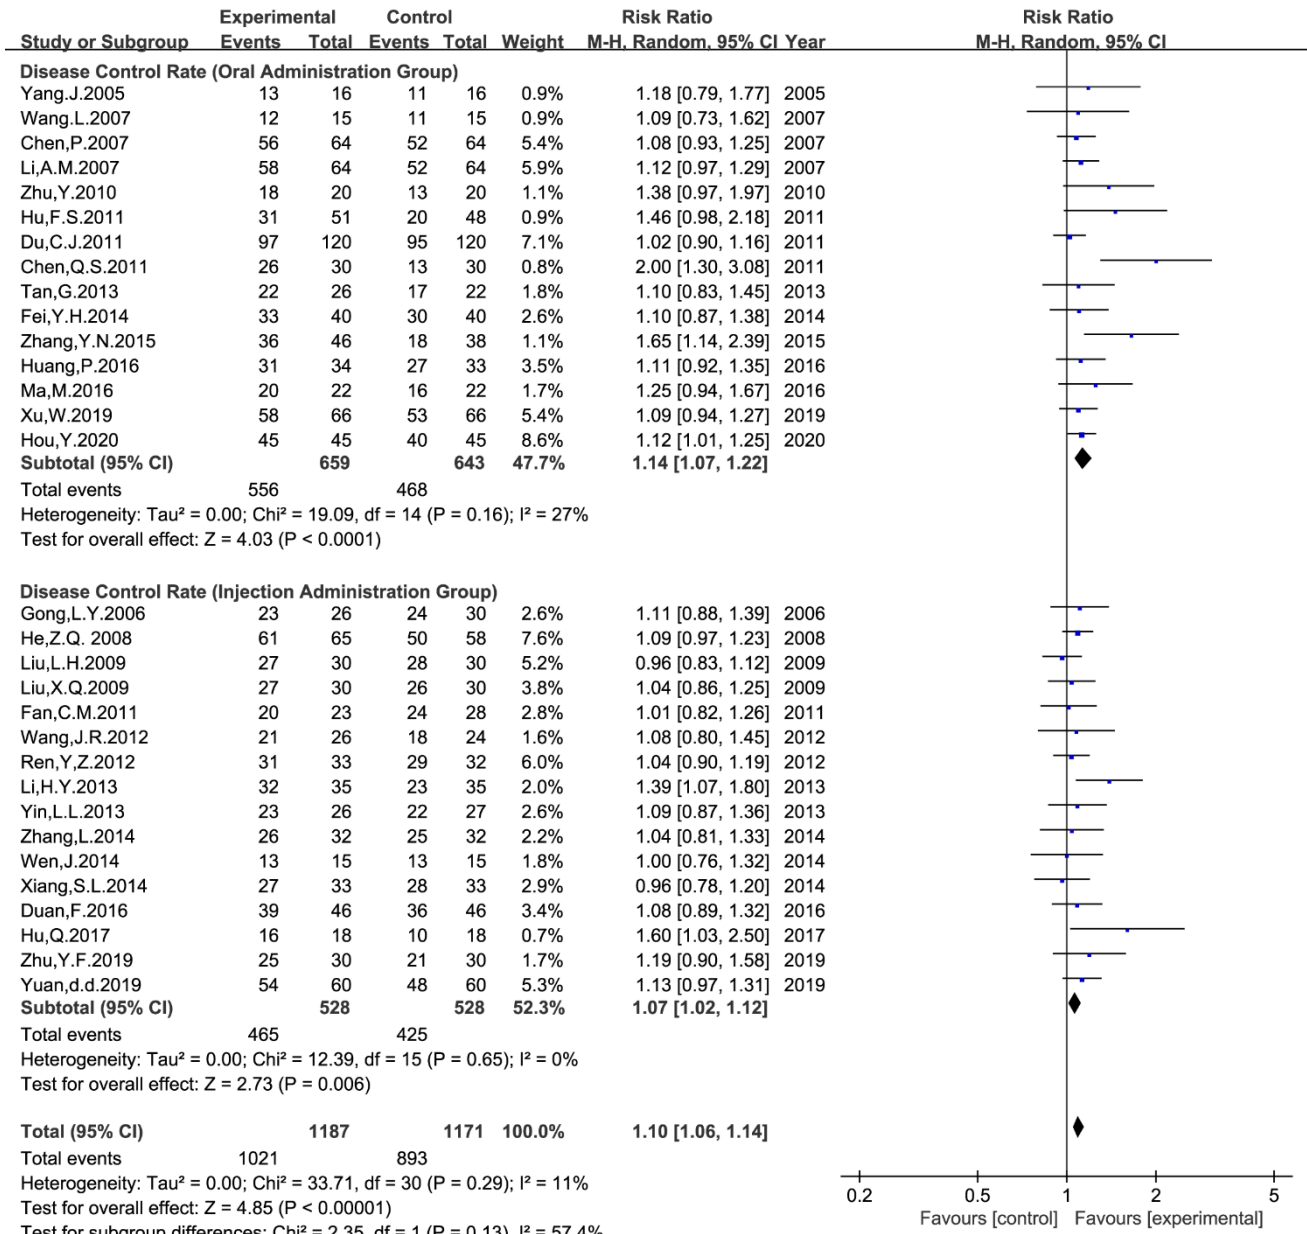

**Figure S12. Subgroup analysis of DCR via drug delivery**



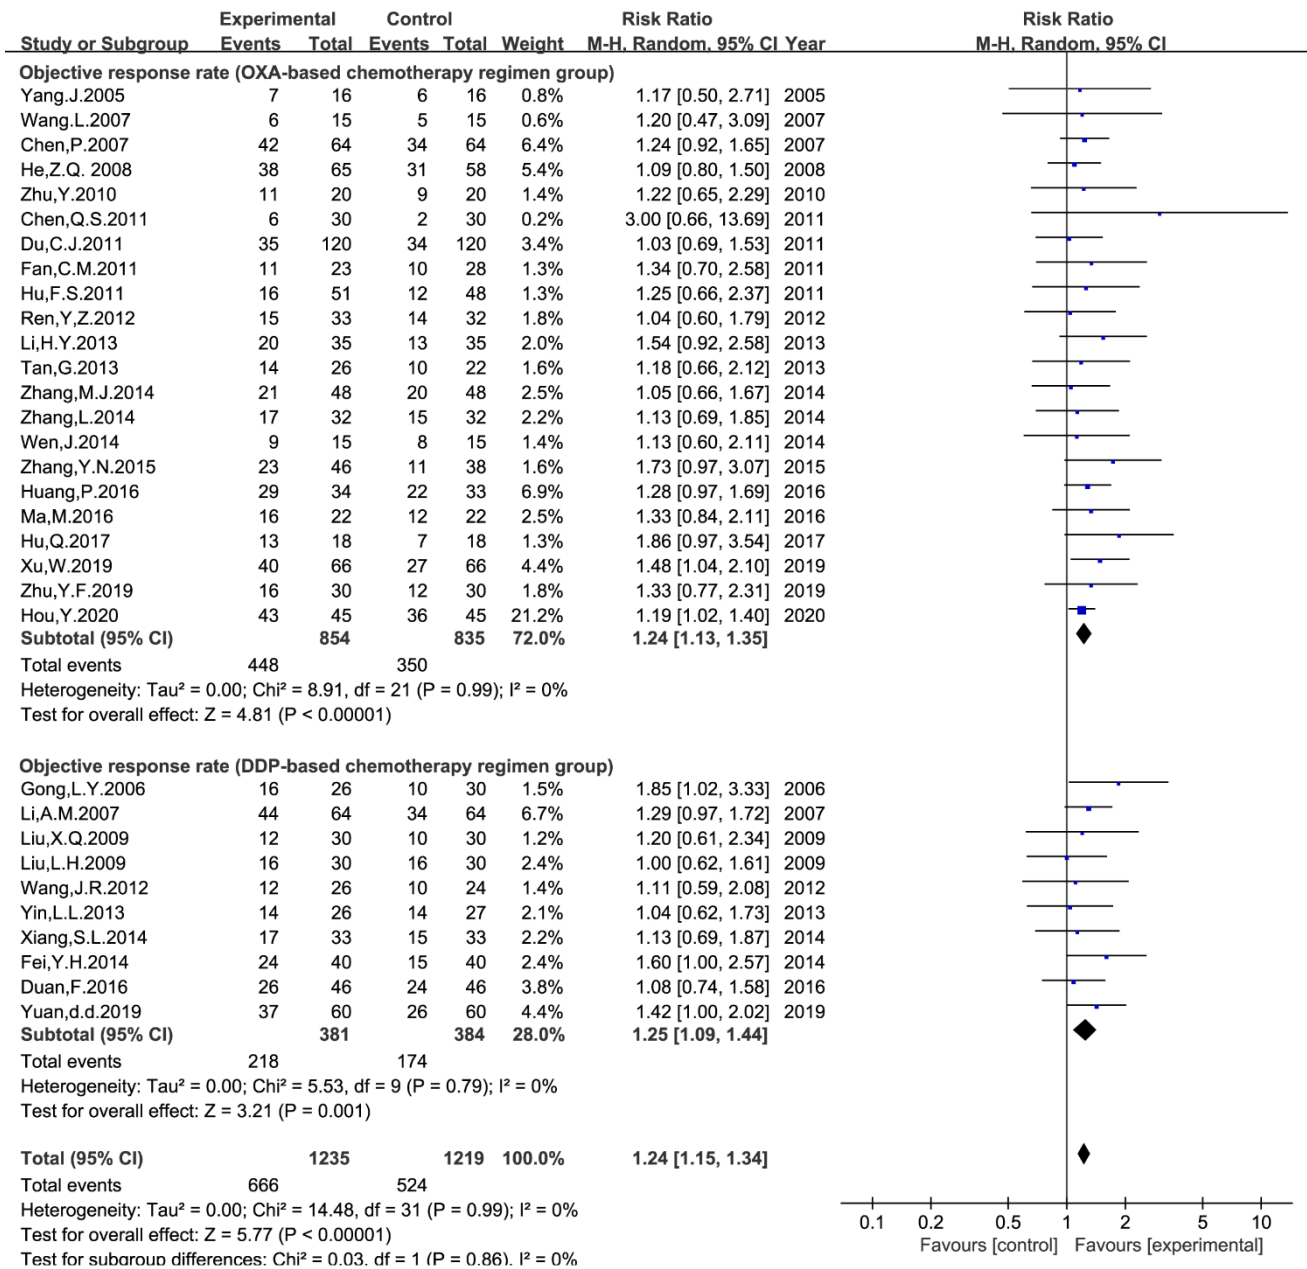

**Figure S13. Subgroup analysis of ORR via chemotherapy regimen**

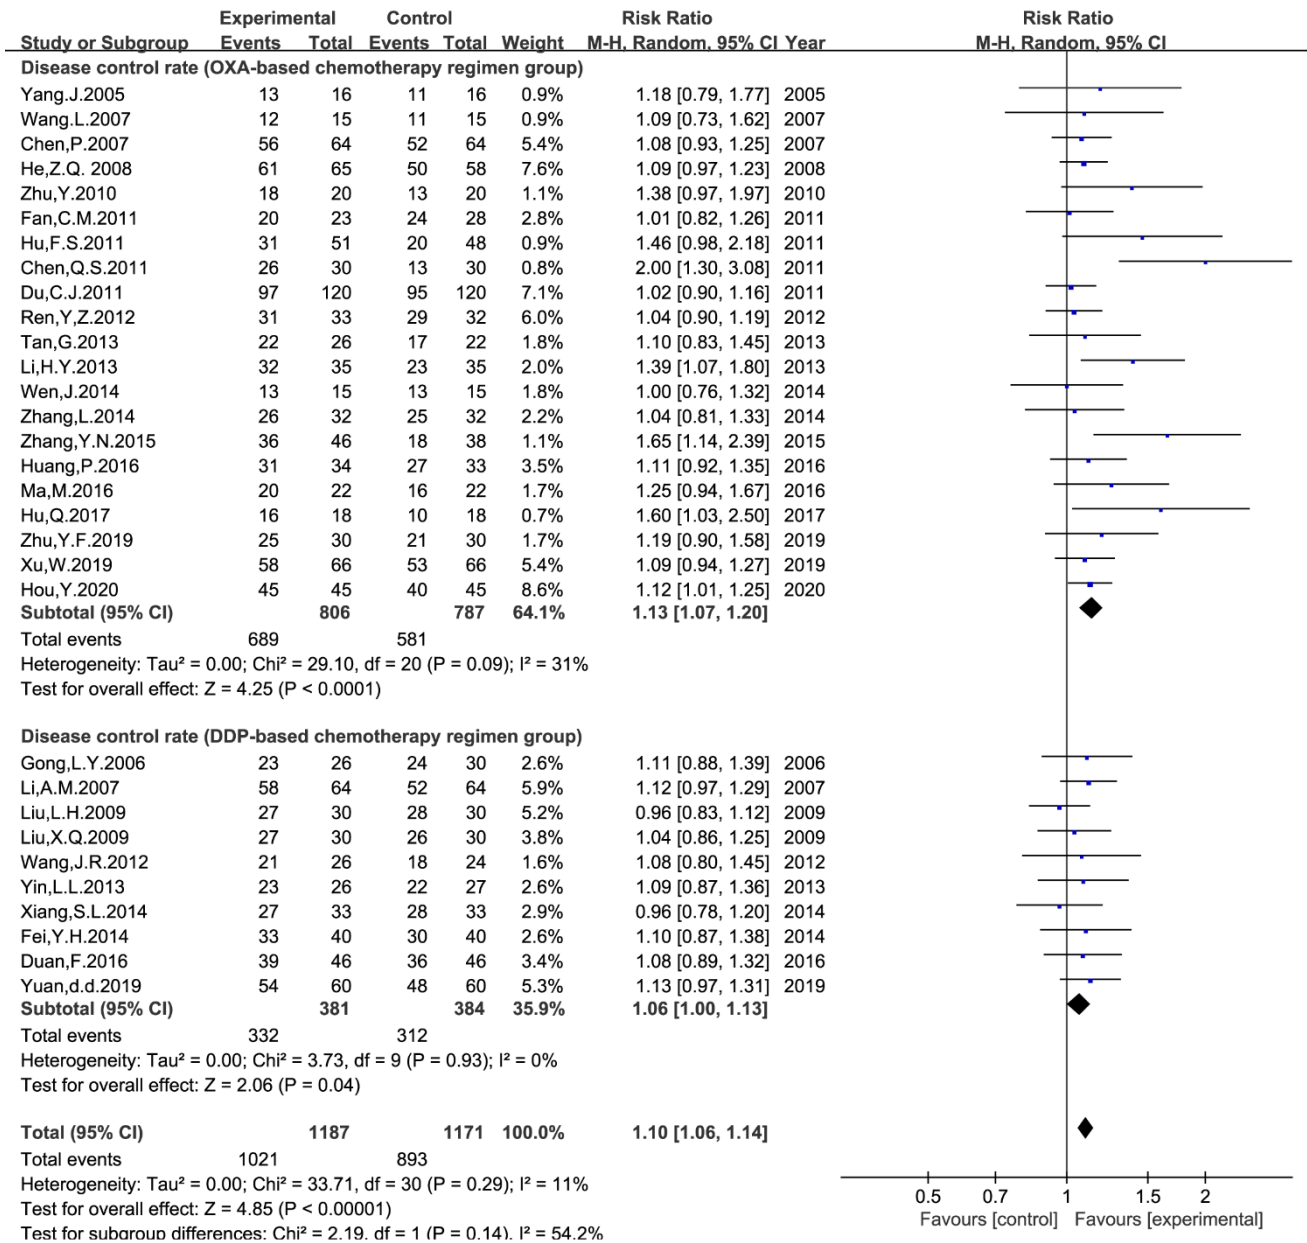

**Figure S14. Subgroup analysis of DCR via chemotherapy regimen**

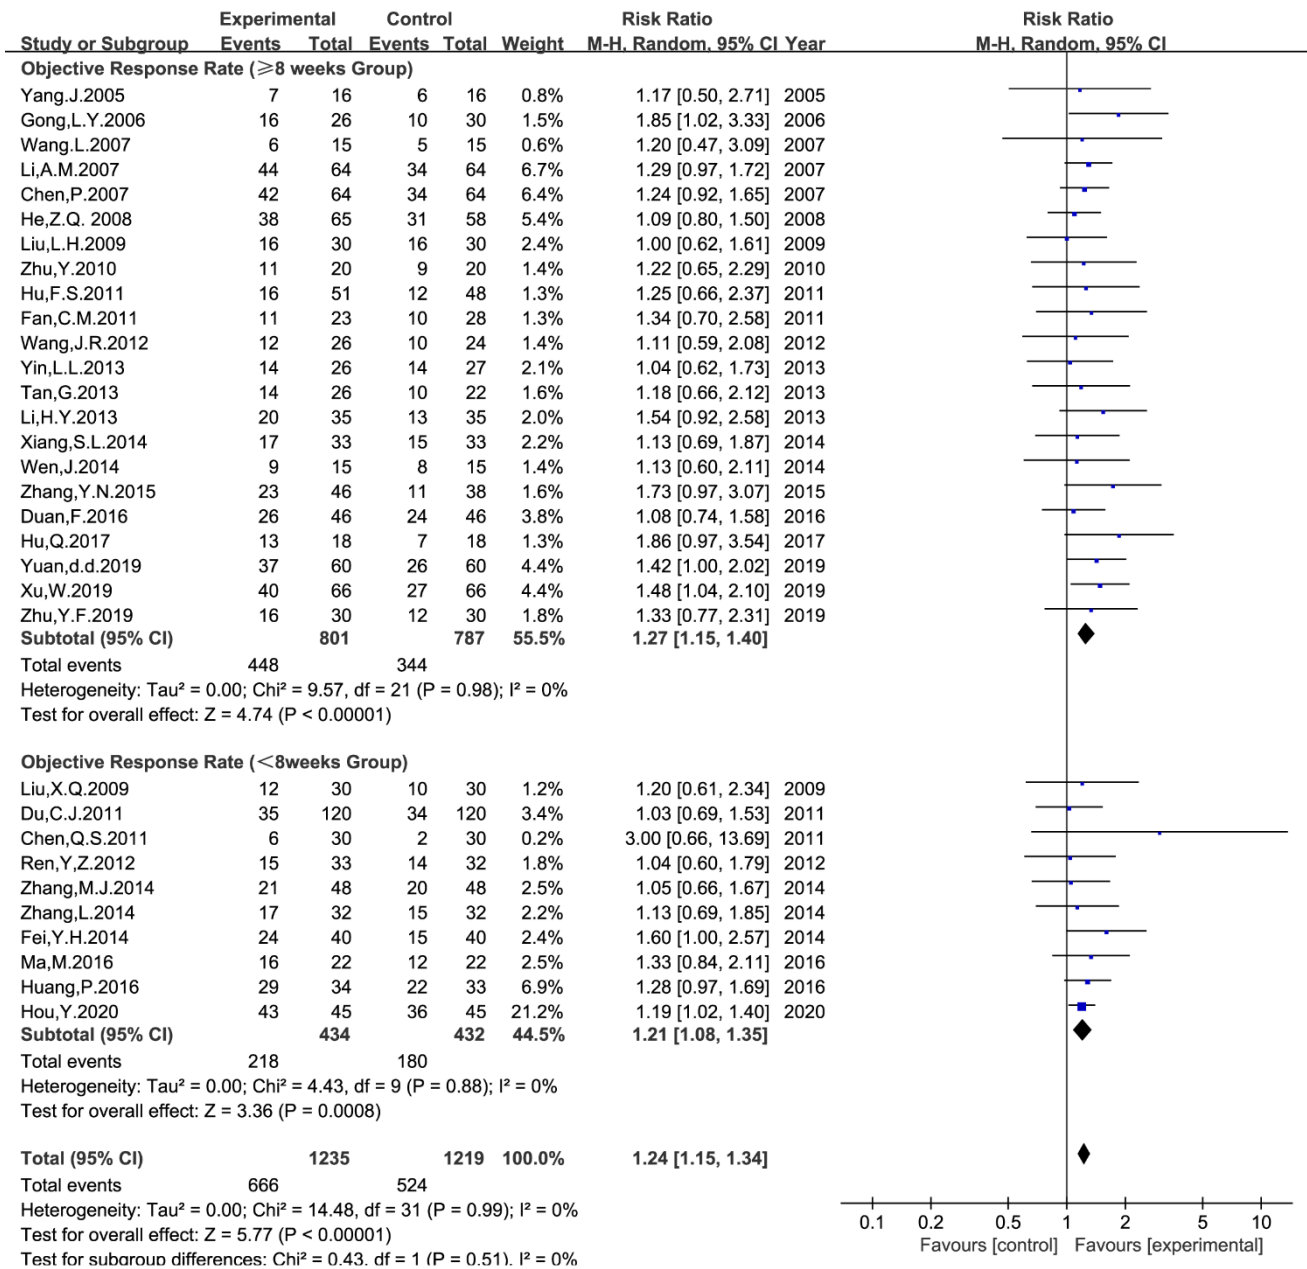

**Figure S15. Subgroup analysis of ORR via treatment duration**

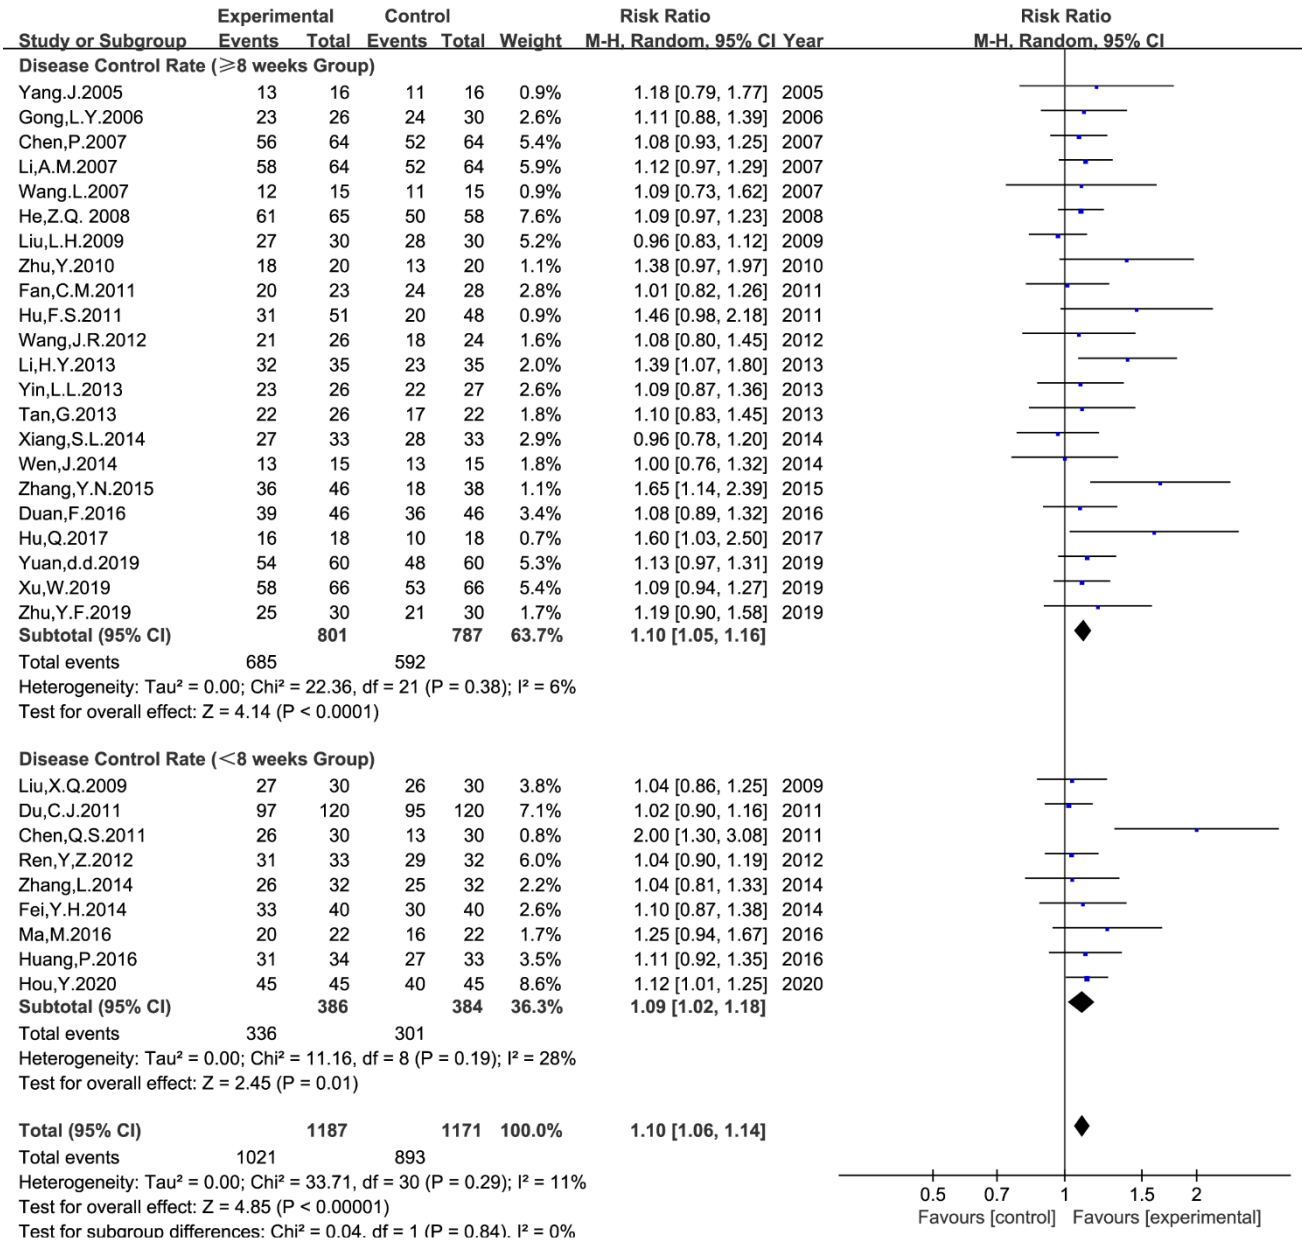

**Figure S16. Subgroup analysis of DCR via treatment duration**

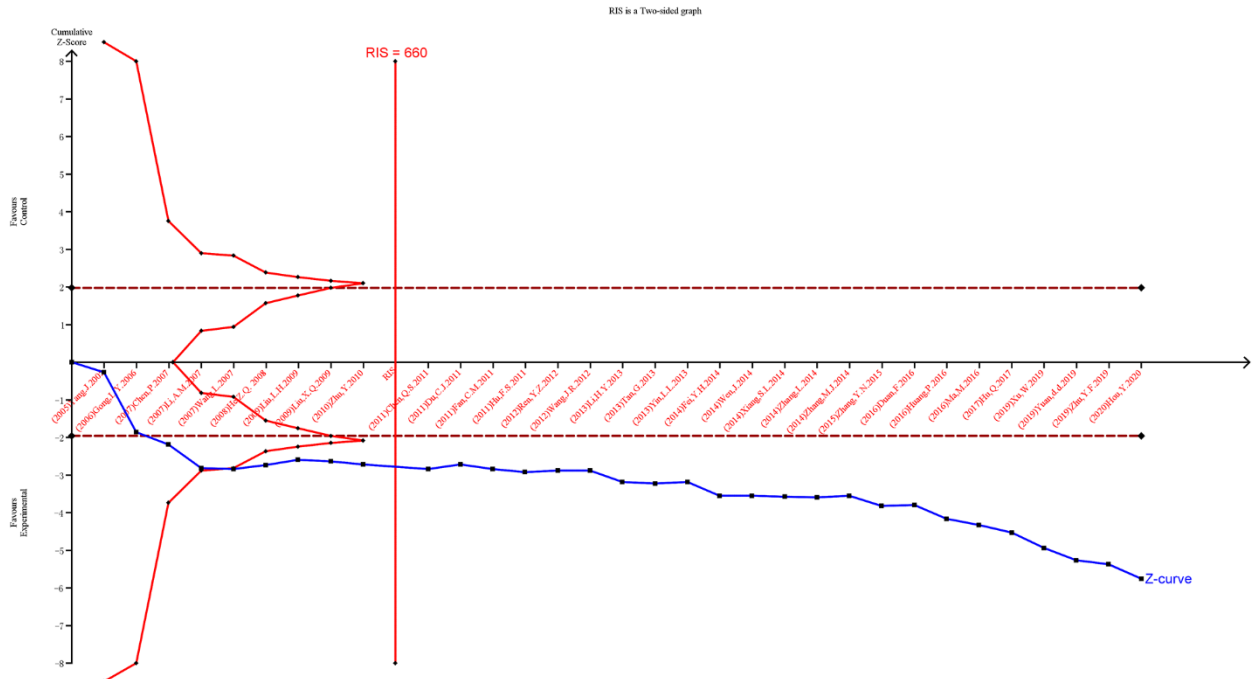

**Figure S17. TSA of ORR**

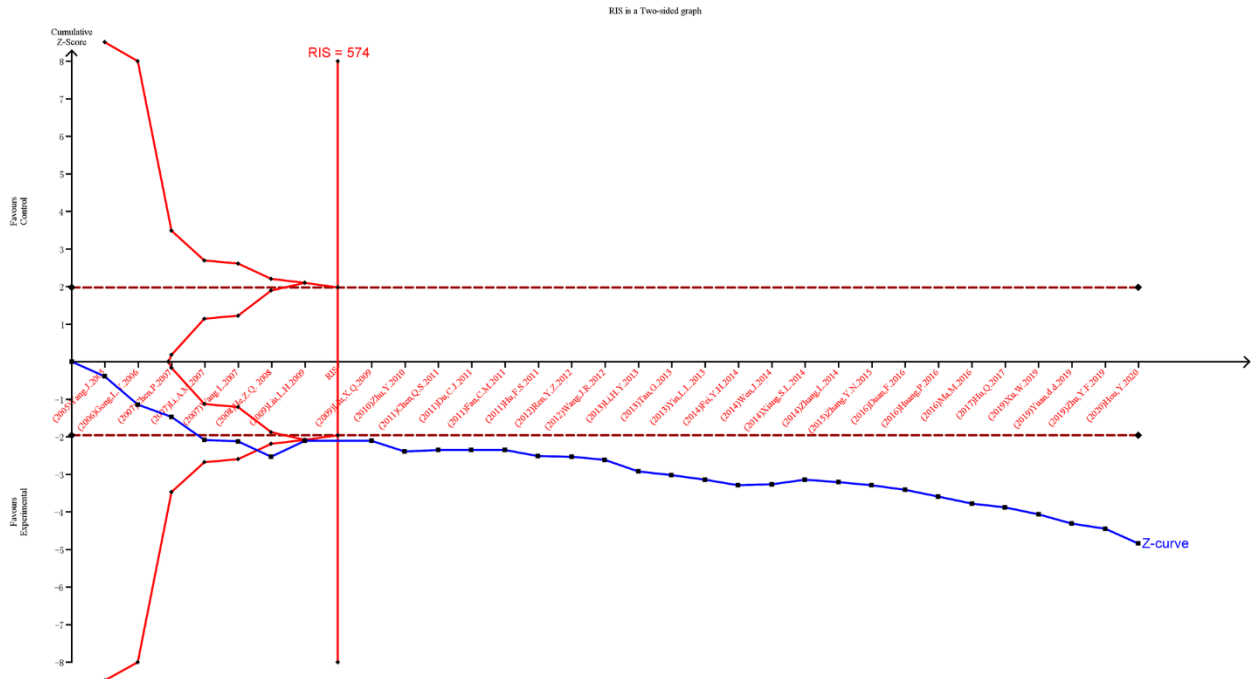

**Figure S18. TSA of DCR**

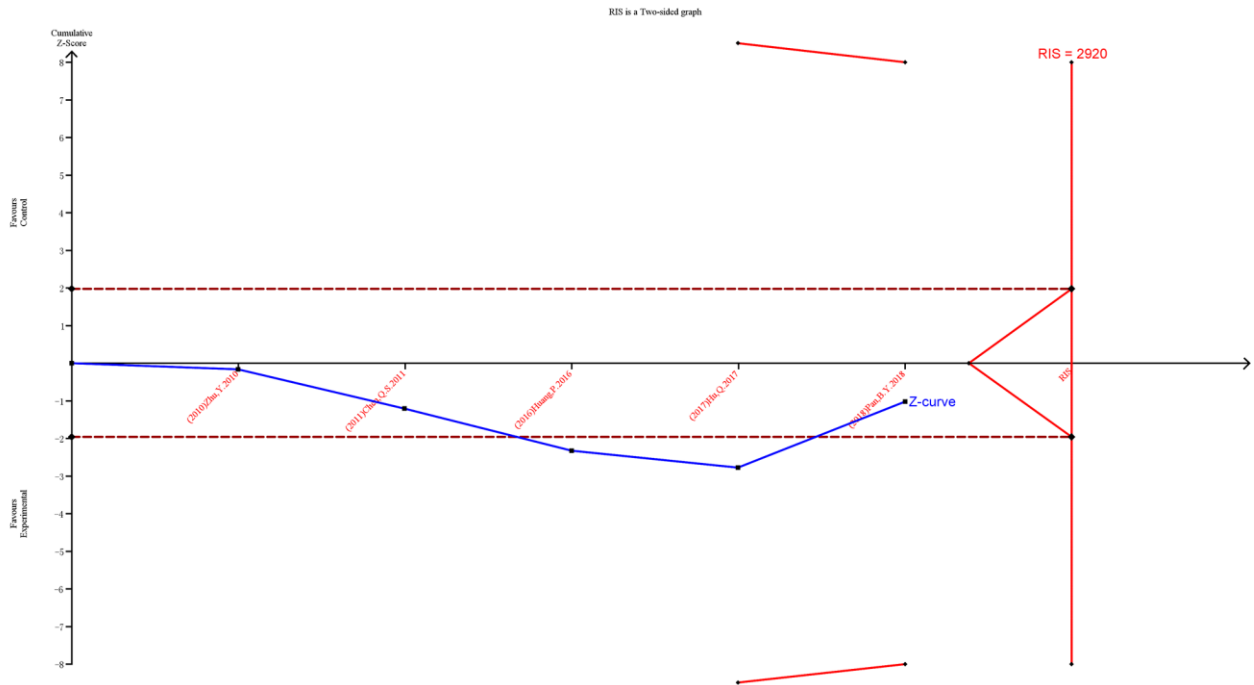

Figure S19. TSA of half-year survival rate

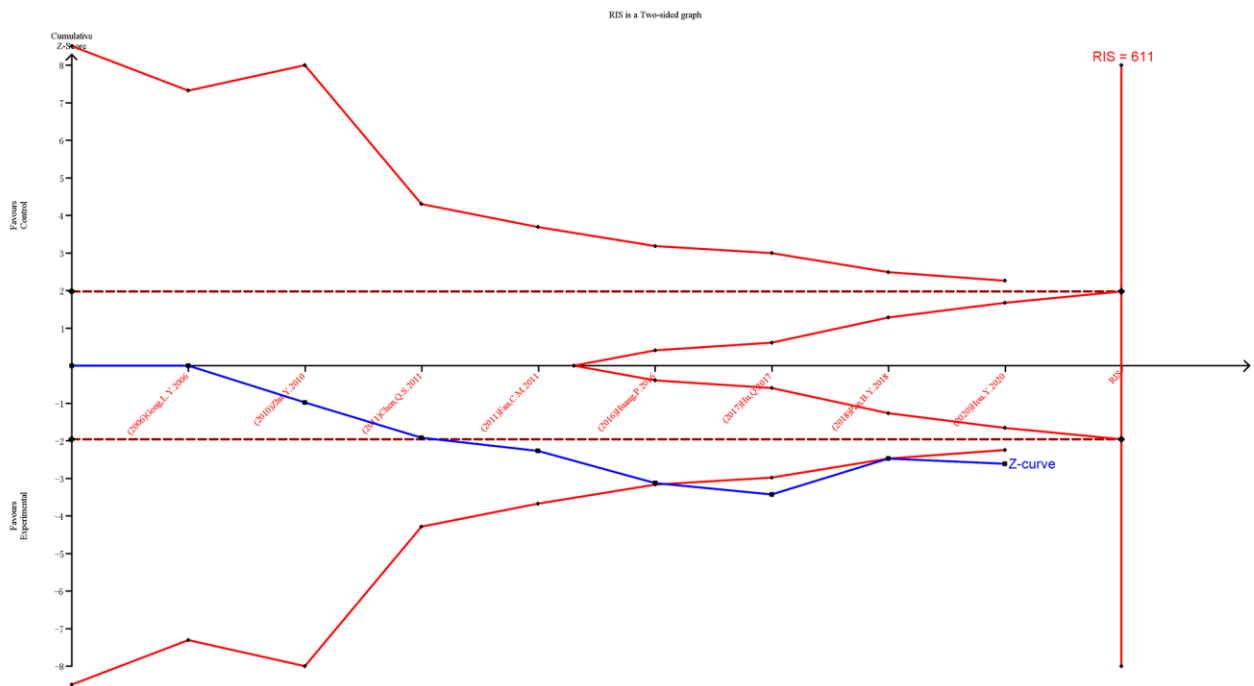

Figure S20. TSA of 1-year survival rate

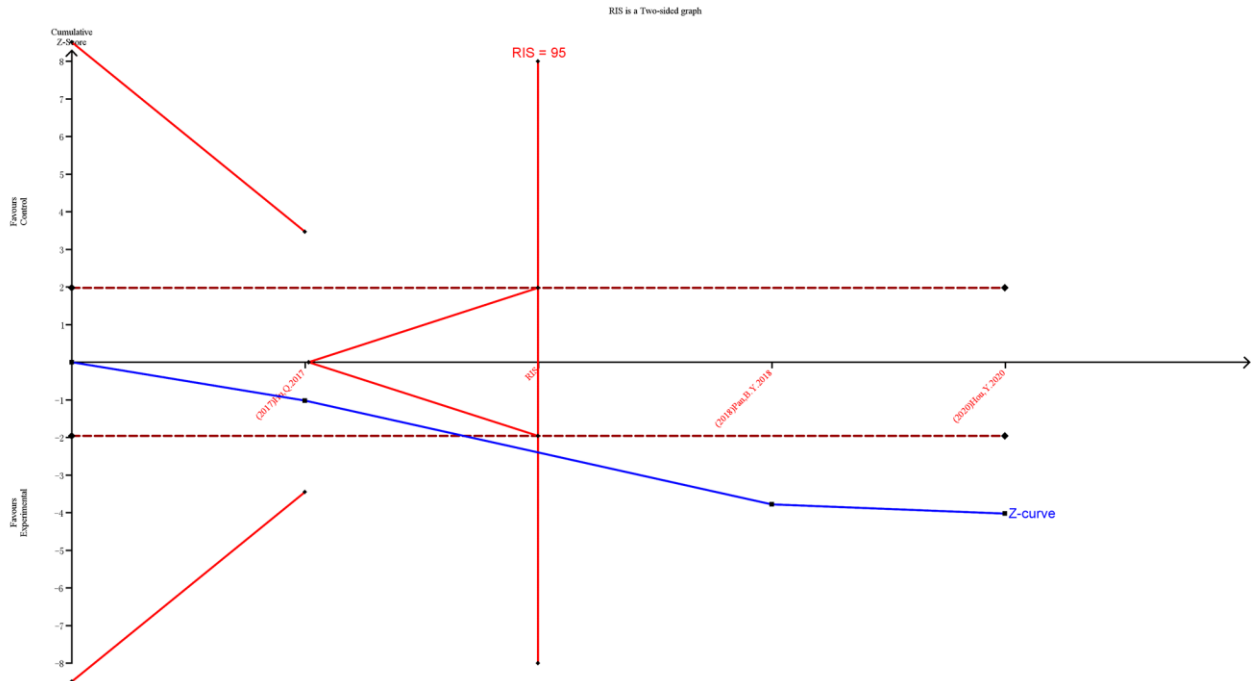

Figure S21. TSA of 2-year survival rate

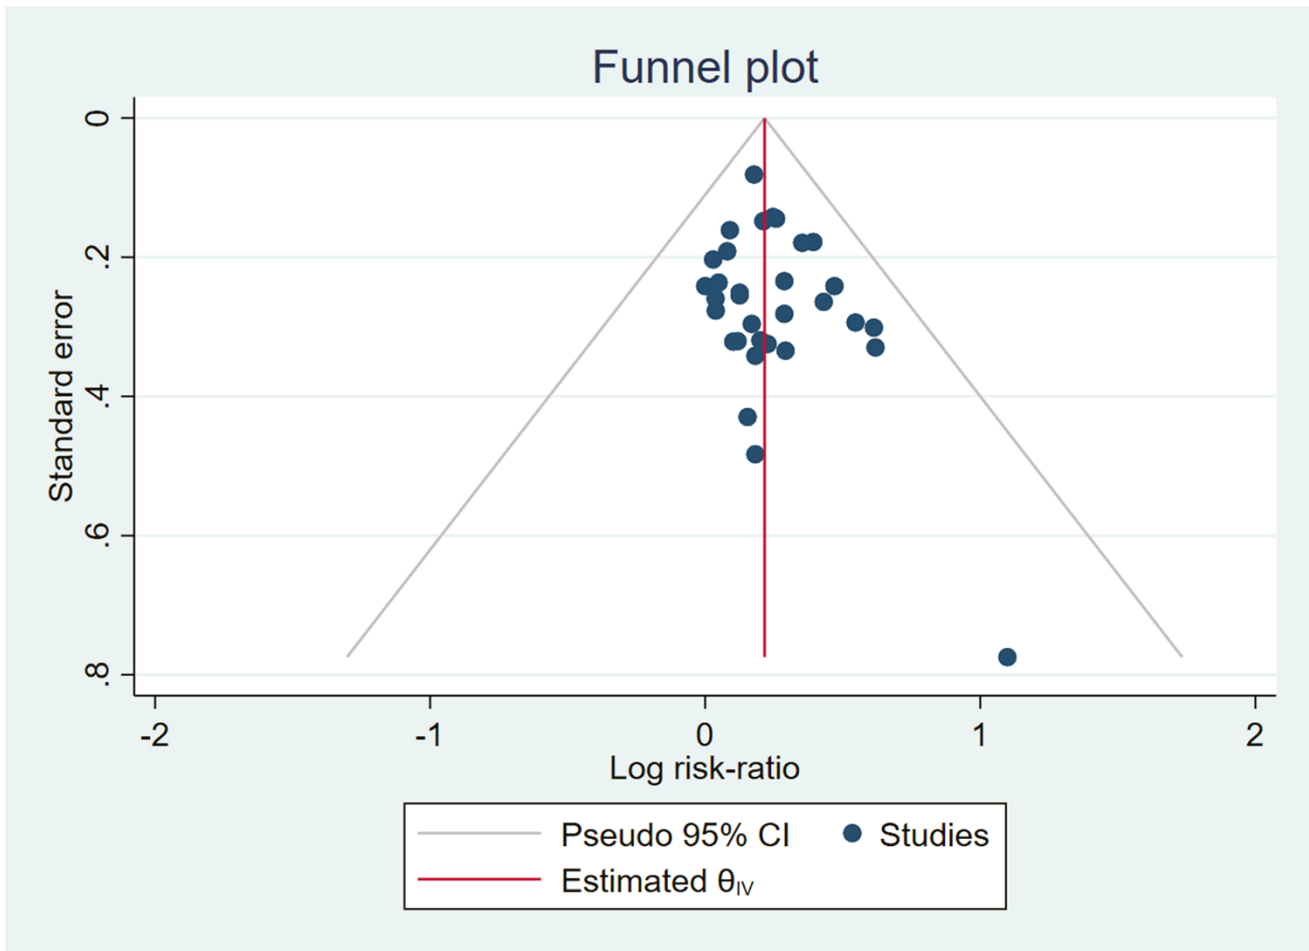

Figure S22. ORR funnel plot



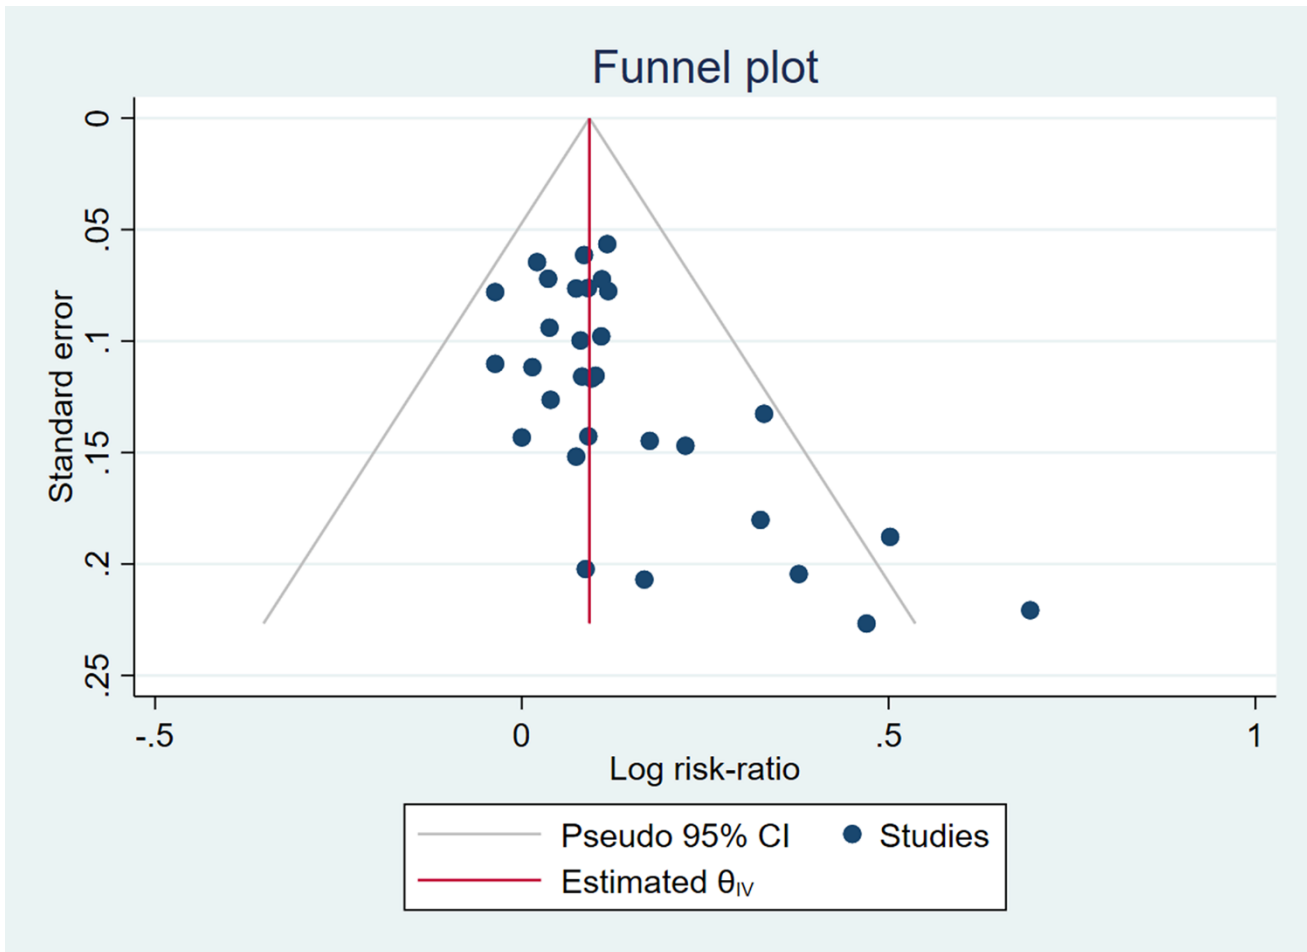

Figure S23. DCR funnel plot

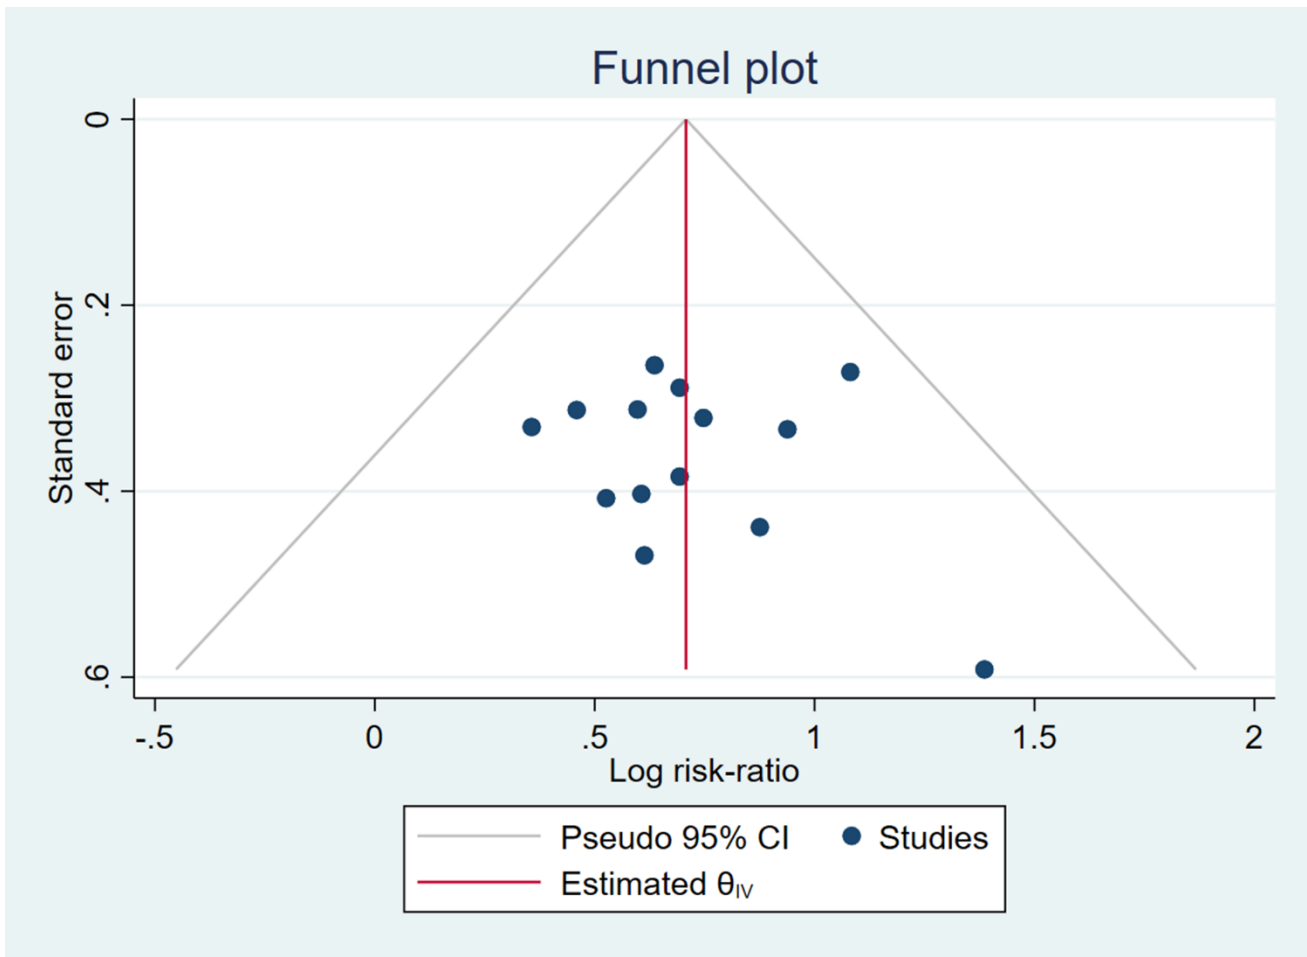

Figure S24. QOL funnel plot

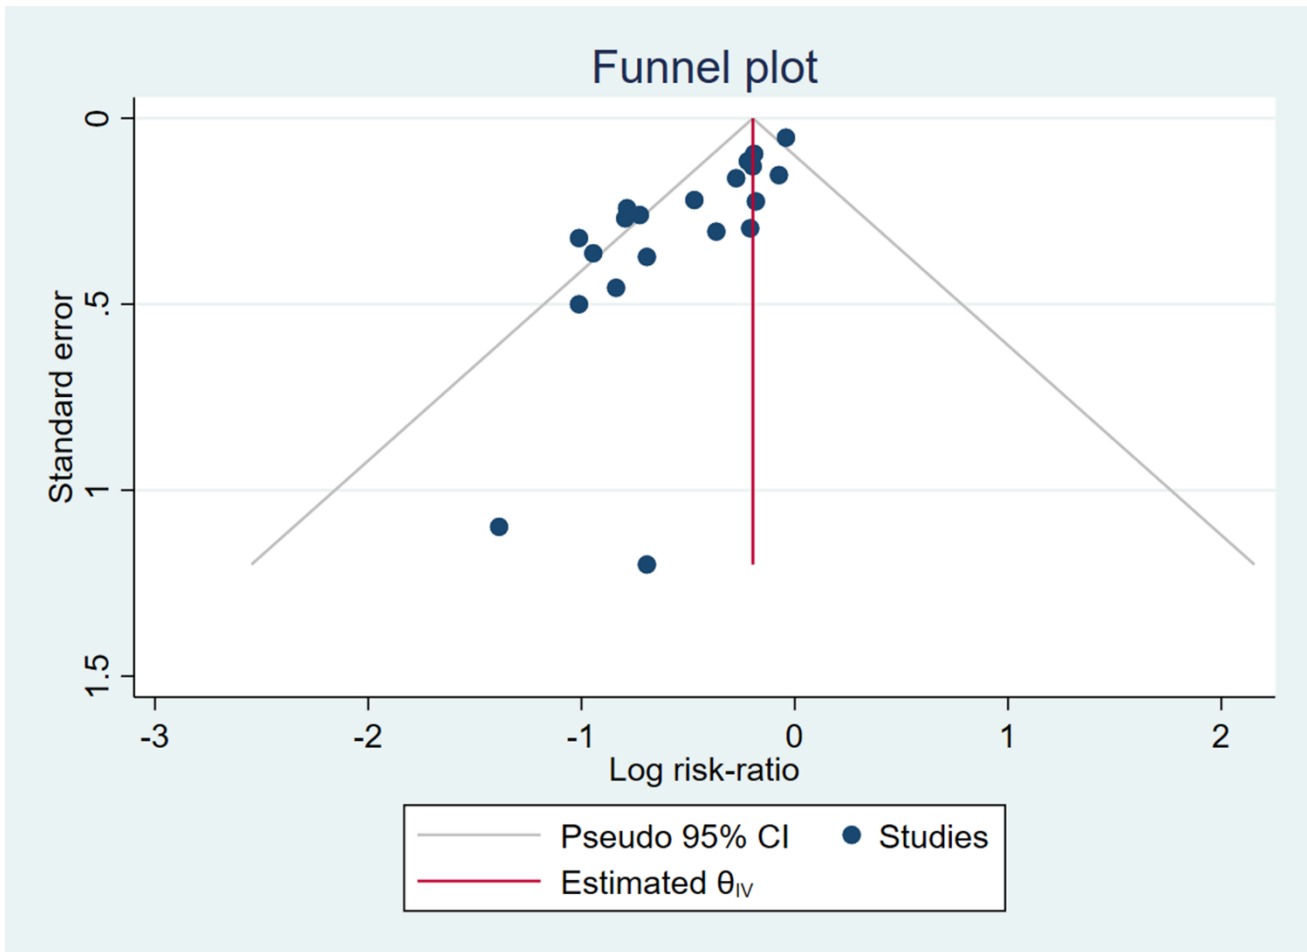

Figure S25. Neutropenia funnel plot

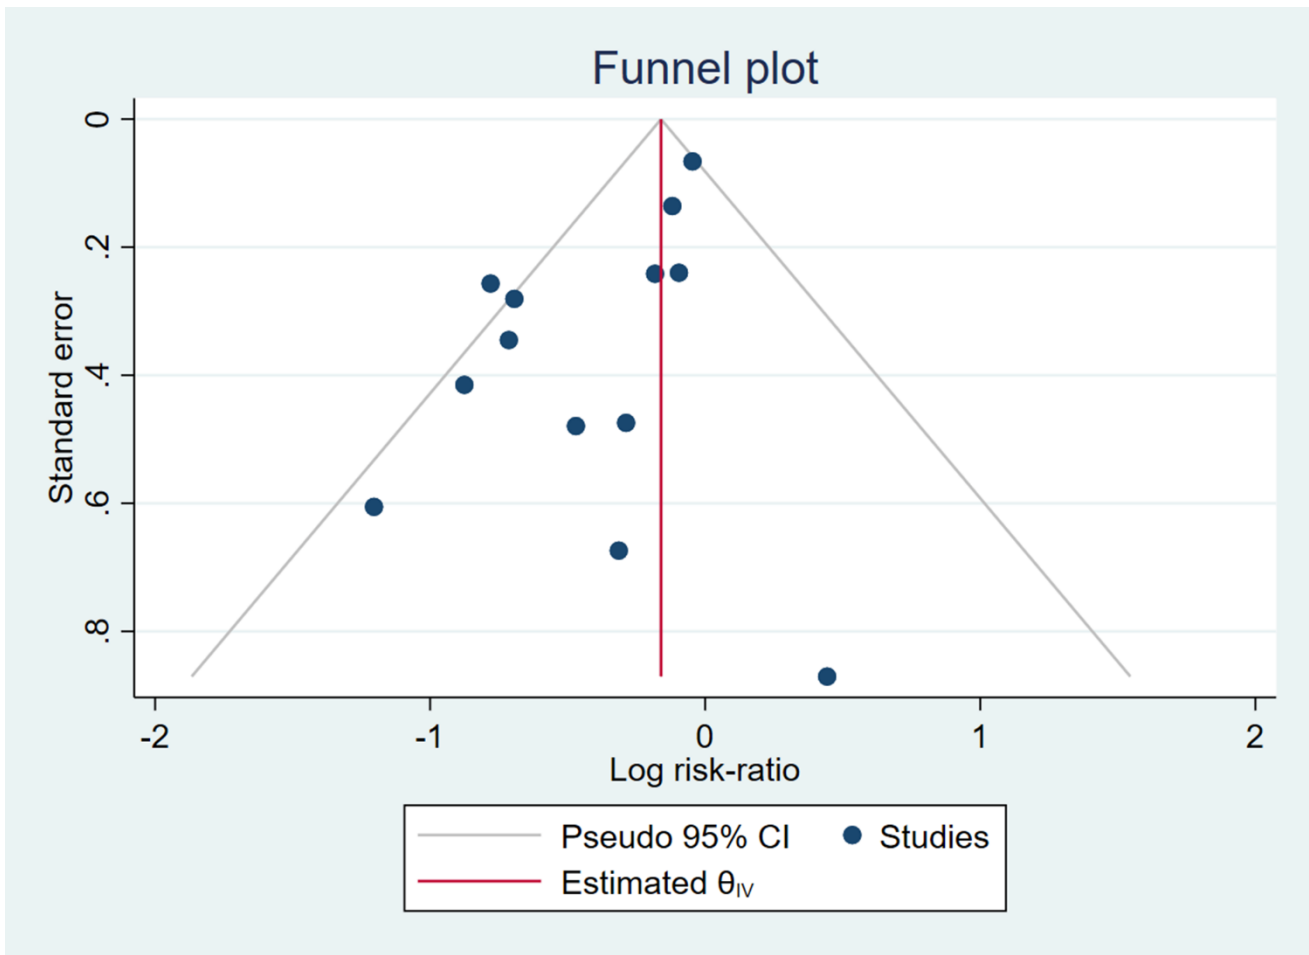

Figure S26. Anemia funnel plot

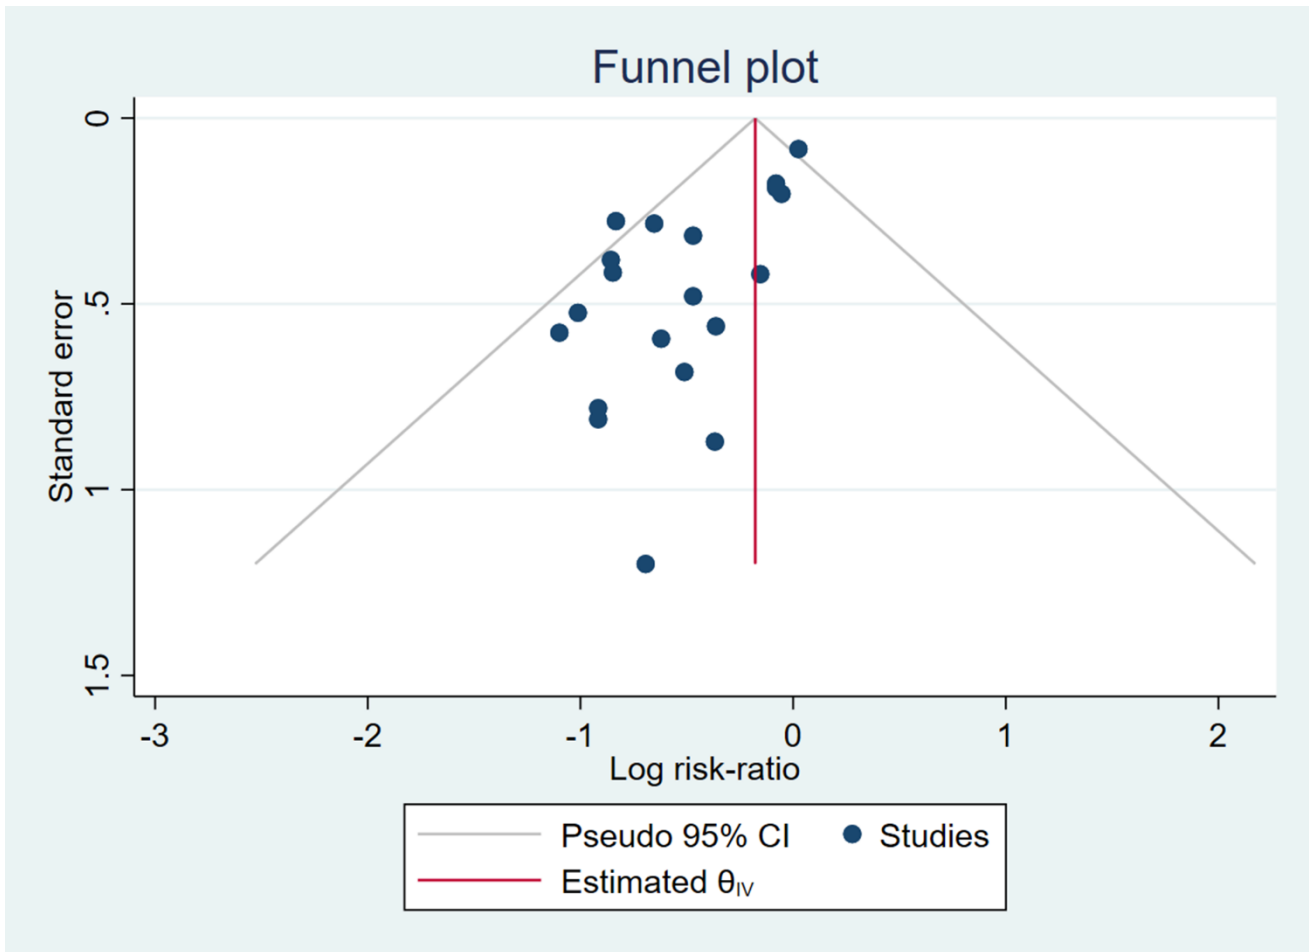

Figure S27. Thrombocytopenia funnel plot

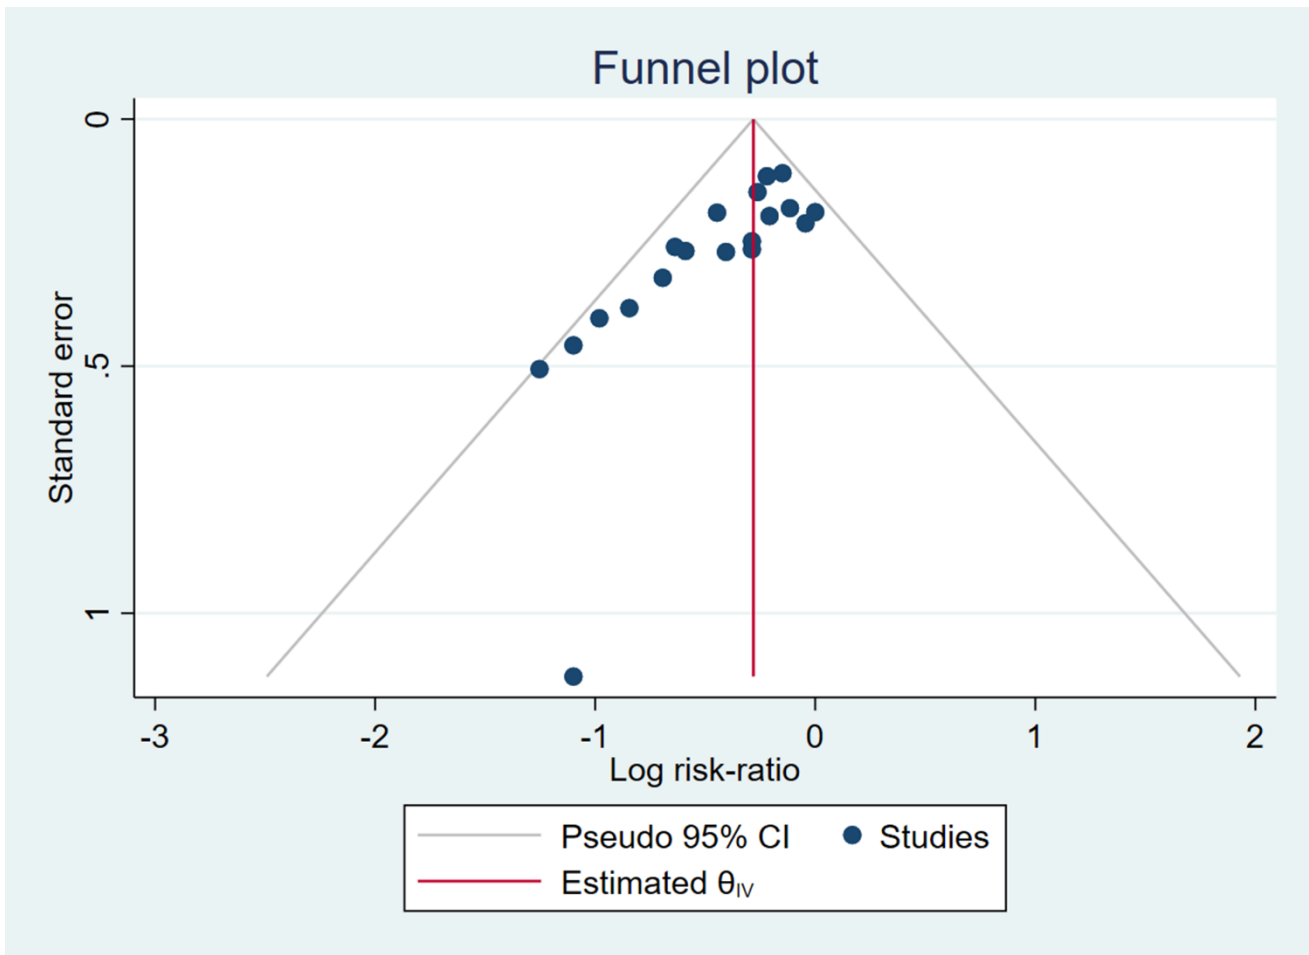

Figure S28.Nausea and vomiting funnel plot

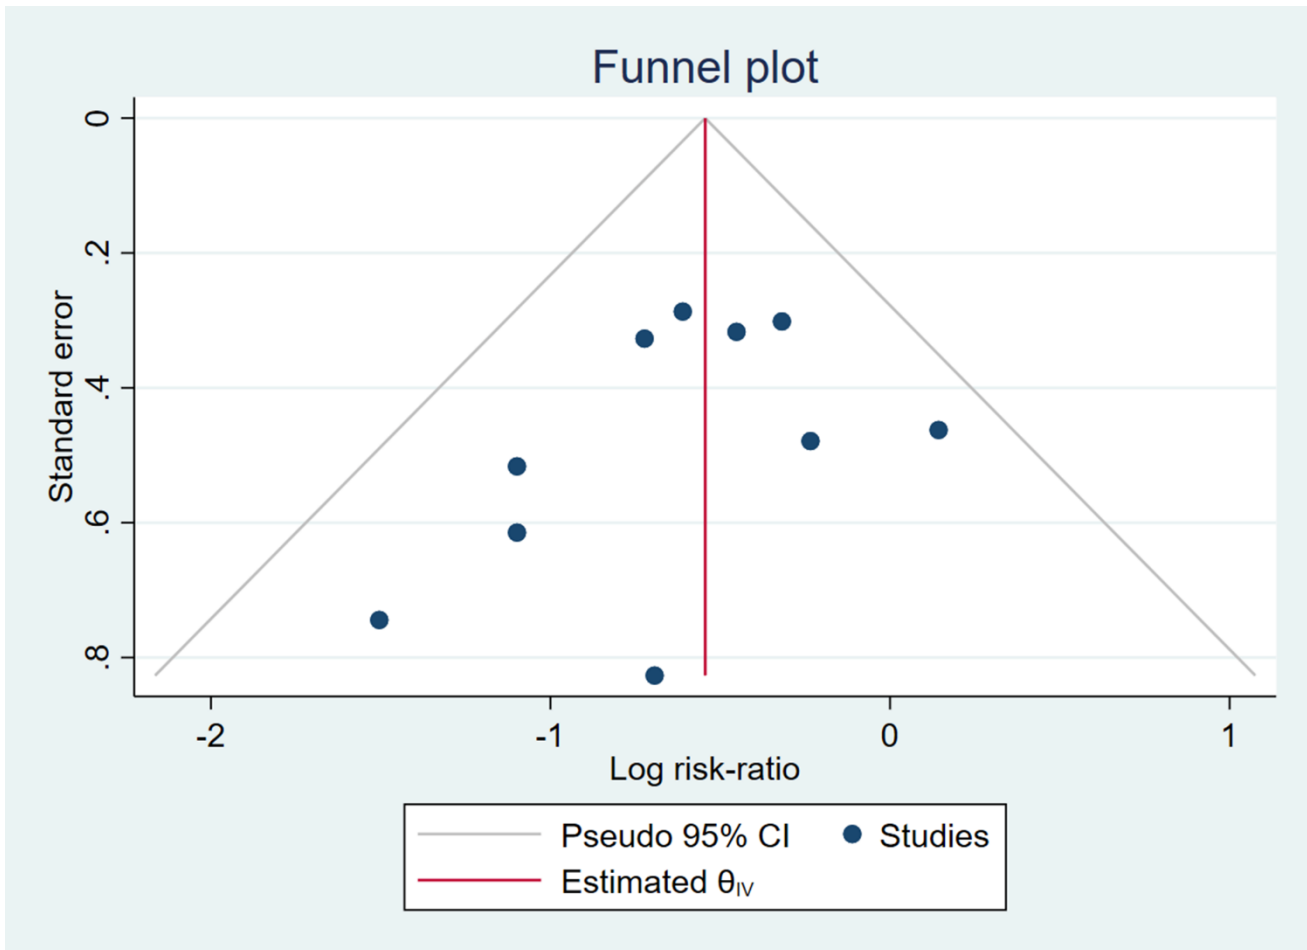

Figure S29. Diarrhea funnel plot



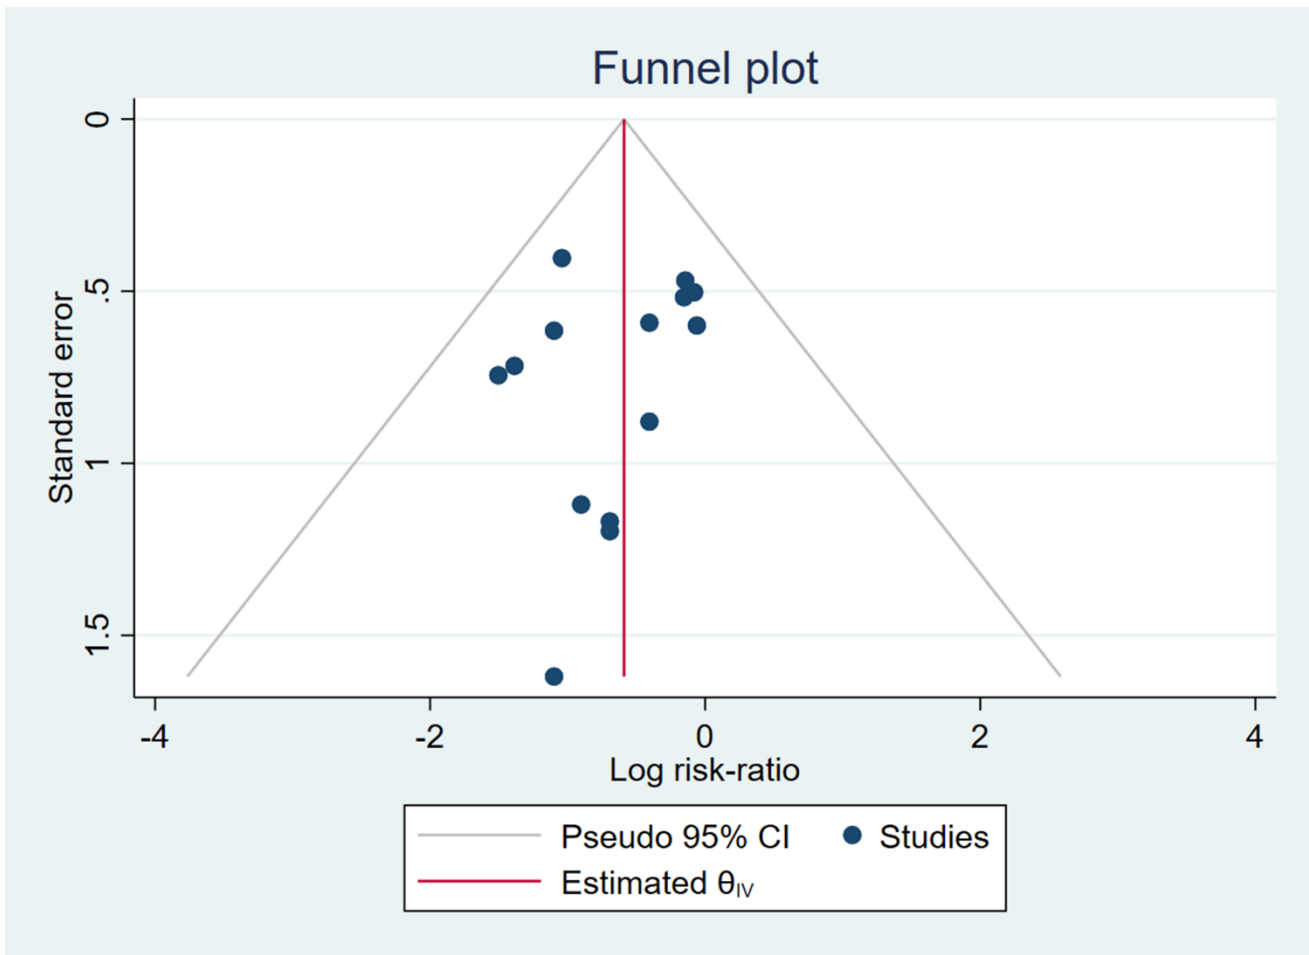

**Figure S30. Hepatic Dysfunction funnel plot**

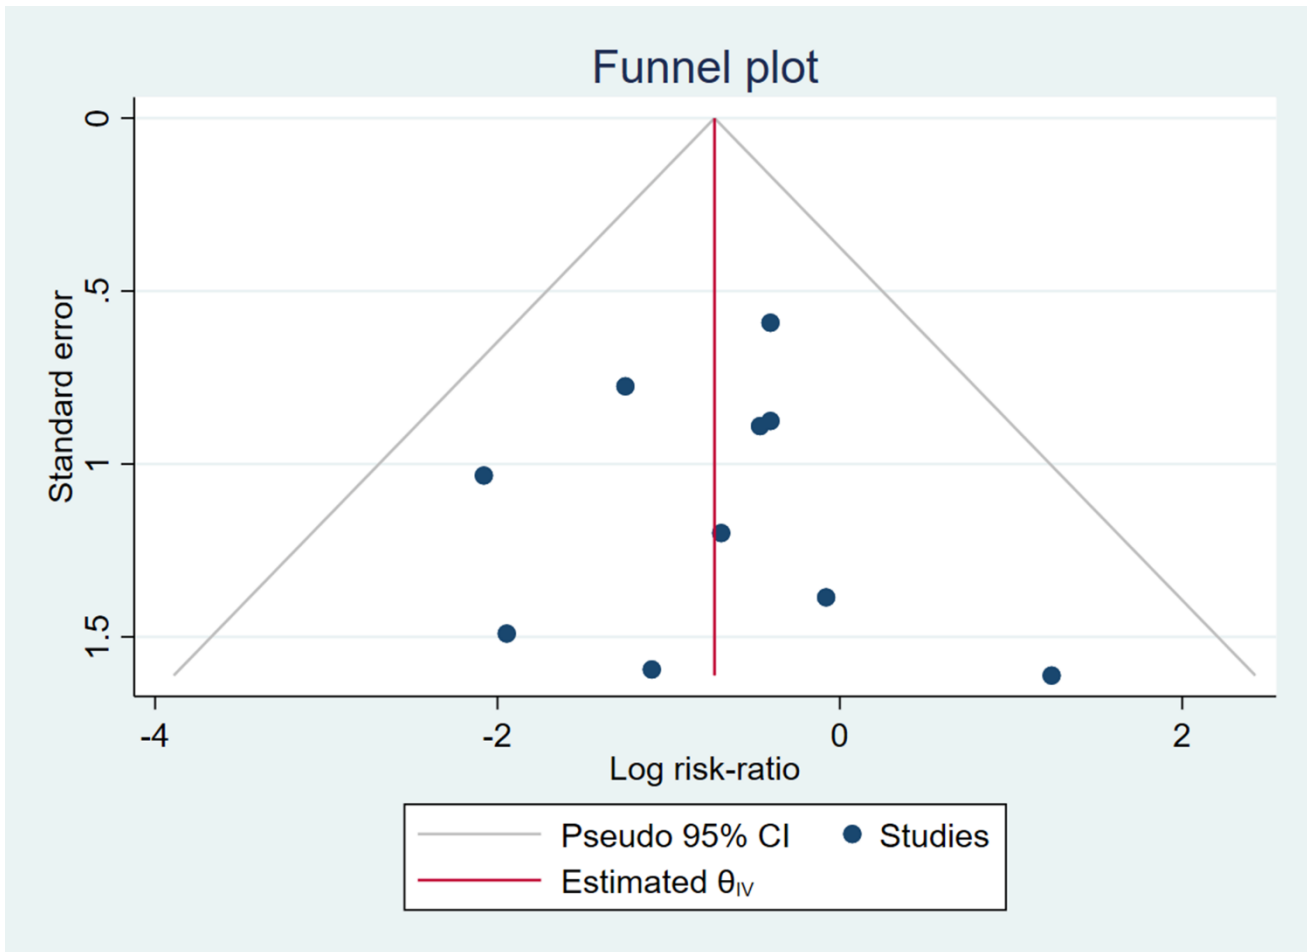

Figure S31. Renal Dysfunction funnel plot

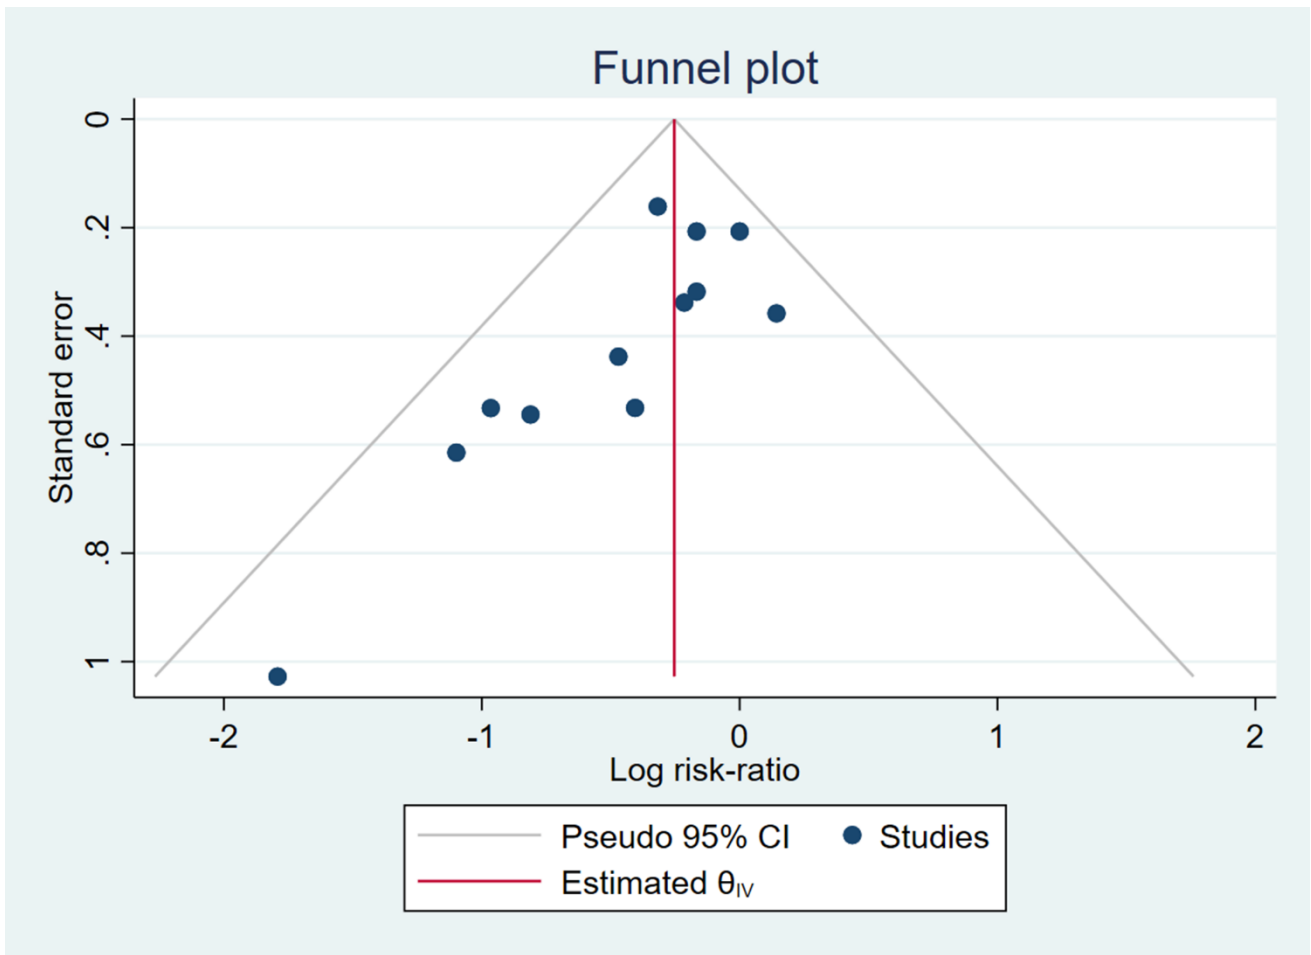

Figure S32. Neurotoxicity funnel plot

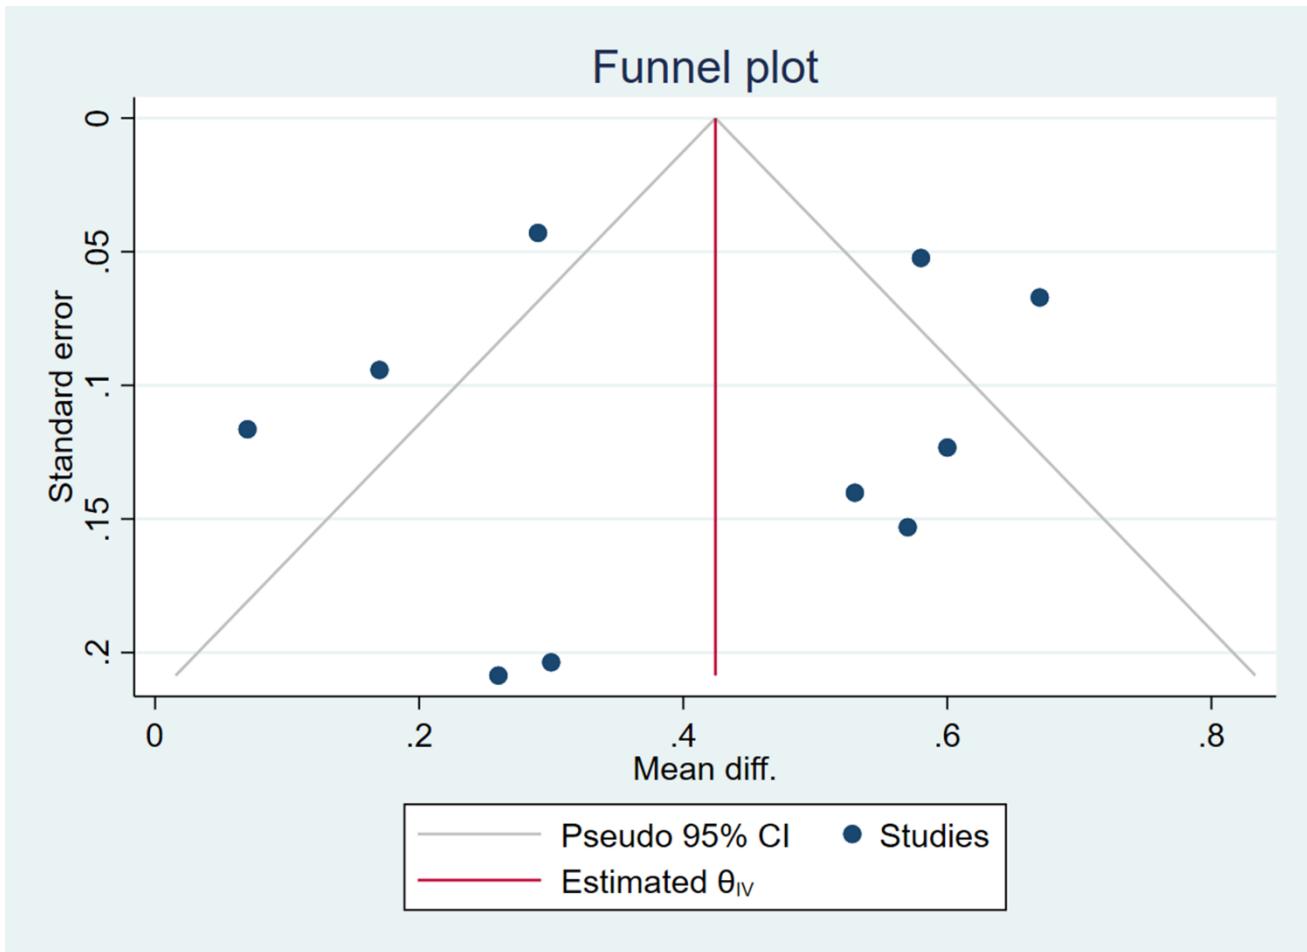

Figure S33.CD4<sup>+</sup>/CD8<sup>+</sup> ratio funnel plot

## 2.2 Supplementary Tables

**Table S1. Subgroup analysis of outcomes ( $I^2 > 50\%$ )**

**Table S1a. Subgroup analysis of Dichotomous outcomes ( $I^2 > 50\%$ )**

| Subgroups                         | Number of studies | RR (95% CI)       | Z    | P       | Heterogeneity |          |
|-----------------------------------|-------------------|-------------------|------|---------|---------------|----------|
|                                   |                   |                   |      |         | $I^2$         | $P_h$    |
| <b>1. Half year survival rate</b> |                   |                   |      |         |               |          |
| <b>Drug delivery</b>              |                   |                   |      |         |               |          |
| Orally                            | 4                 | 1.12 (0.84, 1.50) | 0.79 | 0.43    | 91%           | <0.00001 |
| Injection                         | 1                 | 1.19 (0.95, 1.50) | 1.53 | 0.13    | /             | /        |
| <b>PBC regimens</b>               |                   |                   |      |         |               |          |
| DDP-based chemotherapy regimen    | 1                 | 1.00 (0.97, 1.04) | 0.00 | 1.00    | /             | /        |
| OXA-based chemotherapy regimen    | 4                 | 1.18 (1.05, 1.33) | 2.79 | 0.005   | 0%            | 0.68     |
| <b>Treatment duration</b>         |                   |                   |      |         |               |          |
| ≥8 weeks                          | 3                 | 1.07 (0.88, 1.29) | 0.67 | 0.50    | 74%           | 0.02     |
| <8 weeks                          | 2                 | 1.24 (1.05, 1.47) | 2.53 | 0.01    | 0%            | 0.60     |
| <b>Data sources</b>               |                   |                   |      |         |               |          |
| from study                        | 3                 | 1.18 (1.03, 1.35) | 2.33 | 0.02    | 0%            | 0.47     |
| extracted from survival curve     | 2                 | 1.08 (0.80, 1.45) | 0.51 | 0.61    | 85%           | 0.009    |
| <b>2. 1-year survival rate</b>    |                   |                   |      |         |               |          |
| <b>Drug delivery</b>              |                   |                   |      |         |               |          |
| Orally                            | 5                 | 1.62 (0.99, 2.66) | 1.92 | 0.06    | 85%           | <0.0001  |
| Injection                         | 3                 | 1.21 (0.91, 1.60) | 1.33 | 0.18    | 0%            | 0.65     |
| <b>PBC regimens</b>               |                   |                   |      |         |               |          |
| DDP-based chemotherapy regimen    | 2                 | 1.12 (1.02, 1.23) | 2.27 | 0.02    | 0%            | 0.55     |
| OXA-based chemotherapy regimen    | 6                 | 1.58 (1.27, 1.96) | 4.16 | <0.0001 | 0%            | 0.74     |
| <b>Treatment duration</b>         |                   |                   |      |         |               |          |
| ≥8 weeks                          | 5                 | 1.19 (1.02, 1.38) | 3.60 | 0.0003  | 0%            | 0.42     |
| <8 weeks                          | 3                 | 1.83 (1.31, 2.55) | 3.54 | 0.0004  | 0%            | 0.85     |

|                                |    |                   |      |          |     |          |
|--------------------------------|----|-------------------|------|----------|-----|----------|
| <b>Data sources</b>            |    |                   |      |          |     |          |
| from study                     | 6  | 1.51 (1.21, 1.90) | 2.33 | 0.02     | 0%  | 0.47     |
| extracted from survival curve  | 2  | 1.41 (1.09, 1.82) | 2.14 | 0.03     | 6%  | 0.30     |
| <b>3. Neutropenia</b>          |    |                   |      |          |     |          |
| <b>Drug delivery</b>           |    |                   |      |          |     |          |
| Orally                         | 8  | 0.57 (0.41, 0.78) | 3.51 | 0.0005   | 67% | 0.003    |
| Injection                      | 12 | 0.74 (0.61, 0.89) | 3.12 | 0.002    | 71% | <0.0001  |
| <b>PBC regimens</b>            |    |                   |      |          |     |          |
| DDP-based chemotherapy regimen | 8  | 0.74 (0.57, 0.96) | 2.31 | 0.02     | 79% | <0.0001  |
| OXA-based chemotherapy regimen | 12 | 0.61 (0.49, 0.77) | 4.30 | <0.0001  | 59% | 0.005    |
| <b>Treatment duration</b>      |    |                   |      |          |     |          |
| ≥8 weeks                       | 17 | 0.67 (0.55, 0.82) | 3.87 | 0.0001   | 79% | <0.00001 |
| <8 weeks                       | 3  | 0.51 (0.23, 1.11) | 1.71 | 0.09     | 81% | 0.005    |
| <b>4. Anemia</b>               |    |                   |      |          |     |          |
| <b>Drug delivery</b>           |    |                   |      |          |     |          |
| Orally                         | 6  | 0.72 (0.56, 0.94) | 2.45 | 0.01     | 40% | 0.14     |
| Injection                      | 7  | 0.63 (0.33, 1.23) | 1.35 | 0.18     | 83% | <0.00001 |
| <b>PBC regimens</b>            |    |                   |      |          |     |          |
| DDP-based chemotherapy regimen | 3  | 0.95 (0.84, 1.08) | 0.74 | 0.46     | 0%  | 0.74     |
| OXA-based chemotherapy regimen | 10 | 0.64 (0.50, 0.82) | 3.54 | 0.0004   | 42% | 0.08     |
| <b>Treatment duration</b>      |    |                   |      |          |     |          |
| ≥8 weeks                       | 10 | 0.75 (0.57, 0.98) | 2.12 | 0.03     | 63% | 0.004    |
| <8 weeks                       | 3  | 0.51 (0.35, 0.73) | 3.61 | 0.0003   | 0%  | 0.65     |
| <b>5. Thrombocytopenia</b>     |    |                   |      |          |     |          |
| <b>Drug delivery</b>           |    |                   |      |          |     |          |
| Orally                         | 8  | 0.60 (0.43, 0.82) | 3.18 | 0.001    | 32% | 0.17     |
| Injection                      | 12 | 0.70 (0.52, 0.95) | 2.28 | 0.02     | 62% | 0.002    |
| <b>PBC regimens</b>            |    |                   |      |          |     |          |
| DDP-based chemotherapy regimen | 7  | 0.98 (0.86, 1.13) | 0.26 | 0.80     | 0%  | 0.57     |
| OXA-based chemotherapy regimen | 13 | 0.59 (0.48, 0.73) | 4.98 | <0.00001 | 6%  | 0.39     |

|                           |    |                   |      |          |     |      |
|---------------------------|----|-------------------|------|----------|-----|------|
| <b>Treatment duration</b> |    |                   |      |          |     |      |
| ≥8 weeks                  | 14 | 0.76 (0.60, 0.97) | 2.22 | 0.03     | 52% | 0.01 |
| <8 weeks                  | 6  | 0.48 (0.35, 0.66) | 4.61 | <0.00001 | 0%  | 0.95 |

**Table S1b. Subgroup analysis of Continuous outcomes ( $I^2 > 50\%$ )**

| Subgroups                                         | Number of studies | Mean difference (95% CI) | Z     | P        | Heterogeneity |          |
|---------------------------------------------------|-------------------|--------------------------|-------|----------|---------------|----------|
|                                                   |                   |                          |       |          | $I^2$         | $P_h$    |
| <b>1. QOL: according to mean ± SD</b>             |                   |                          |       |          |               |          |
| <b>Drug delivery</b>                              |                   |                          |       |          |               |          |
| Orally                                            | 4                 | 14.15 (5.94, 22.37)      | 3.38  | 0.0007   | 96%           | <0.00001 |
| Injection                                         | 2                 | 6.48 (2.52, 10.44)       | 3.21  | 0.001    | 0%            | 0.42     |
| <b>Treatment duration</b>                         |                   |                          |       |          |               |          |
| ≥8 weeks                                          | 4                 | 13.17 (3.67, 22.68)      | 2.72  | 0.007    | 95%           | <0.00001 |
| <8 weeks                                          | 2                 | 9.84 (7.47, 12.21)       | 8.13  | <0.00001 | 0%            | 0.79     |
| <b>2. CD3<sup>+</sup> T cells</b>                 |                   |                          |       |          |               |          |
| <b>Drug delivery</b>                              |                   |                          |       |          |               |          |
| Orally                                            | 5                 | 14.81 (9.00, 20.61)      | 5.00  | <0.00001 | 95%           | <0.00001 |
| Injection                                         | 3                 | 5.73 (1.12, 10.34)       | 2.44  | 0.01     | 89%           | <0.0001  |
| <b>PBC regimens</b>                               |                   |                          |       |          |               |          |
| DDP-based chemotherapy regimen                    | 3                 | 11.49 (-2.71, 25.69)     | 1.59  | 0.11     | 99%           | <0.00001 |
| OXA-based chemotherapy regimen                    | 5                 | 11.49 (6.76, 16.22)      | 4.76  | <0.00001 | 93%           | <0.00001 |
| <b>Treatment duration</b>                         |                   |                          |       |          |               |          |
| ≥8 weeks                                          | 5                 | 6.83 (3.05, 10.61)       | 3.54  | 0.0004   | 92%           | <0.00001 |
| <8 weeks                                          | 3                 | 19.31 (16.03, 22.59)     | 11.53 | <0.00001 | 72%           | 0.03     |
| <b>3. CD3<sup>+</sup> CD4<sup>+</sup> T cells</b> |                   |                          |       |          |               |          |
| <b>Drug delivery</b>                              |                   |                          |       |          |               |          |
| Orally                                            | 5                 | 6.08 (1.32, 10.85)       | 2.50  | 0.01     | 94%           | <0.00001 |
| Injection                                         | 3                 | 6.10 (5.24, 6.97)        | 13.80 | <0.00001 | 19%           | 0.29     |
| <b>PBC regimens</b>                               |                   |                          |       |          |               |          |
| DDP-based chemotherapy regimen                    | 3                 | 5.14 (1.13, 9.15)        | 2.51  | 0.01     | 90%           | <0.0001  |
| OXA-based chemotherapy regimen                    | 5                 | 7.25 (4.16, 10.34)       | 4.60  | <0.00001 | 91%           | <0.00001 |



|                                                         |   |                     |      |          |     |          |  |
|---------------------------------------------------------|---|---------------------|------|----------|-----|----------|--|
| <b>Treatment duration</b>                               |   |                     |      |          |     |          |  |
| ≥8 weeks                                                | 5 | 6.98 (5.12, 8.84)   | 7.35 | <0.00001 | 85% | <0.0001  |  |
| <8 weeks                                                | 3 | 5.12 (-3.96, 14.20) | 1.11 | 0.27     | 95% | <0.00001 |  |
| <b>4. Nature Killer cells</b>                           |   |                     |      |          |     |          |  |
| <b>Drug delivery</b>                                    |   |                     |      |          |     |          |  |
| Orally                                                  | 4 | 3.53 (2.08, 4.99)   | 4.76 | <0.00001 | 0%  | 0.89     |  |
| Injection                                               | 2 | 6.46 (3.01, 9.90)   | 3.67 | 0.0002   | 67% | 0.08     |  |
| <b>PBC regimens</b>                                     |   |                     |      |          |     |          |  |
| DDP-based chemotherapy regimen                          | 1 | 4.14 (0.23, 8.05)   | 2.07 | 0.04     | /   | /        |  |
| OXA-based chemotherapy regimen                          | 5 | 4.63 (2.17, 7.09)   | 3.69 | 0.0002   | 80% | 0.0006   |  |
| <b>Treatment duration</b>                               |   |                     |      |          |     |          |  |
| ≥8 weeks                                                | 5 | 4.56 (2.00, 7.12)   | 3.50 | 0.0005   | 80% | 0.0006   |  |
| <8 weeks                                                | 1 | 4.49 (1.39, 7.59)   | 2.84 | 0.004    | /   | /        |  |
| <b>5. CD4<sup>+</sup>/CD8<sup>+</sup> T cells ratio</b> |   |                     |      |          |     |          |  |
| <b>Drug delivery</b>                                    |   |                     |      |          |     |          |  |
| Orally                                                  | 7 | 0.46 (0.29, 0.63)   | 5.27 | <0.00001 | 83% | <0.00001 |  |
| Injection                                               | 3 | 0.29 (0.21, 0.37)   | 7.12 | <0.00001 | 0%  | 0.99     |  |
| <b>PBC regimens</b>                                     |   |                     |      |          |     |          |  |
| DDP-based chemotherapy regimen                          | 3 | 0.46 (0.15, 0.76)   | 2.92 | 0.003    | 68% | 0.04     |  |
| OXA-based chemotherapy regimen                          | 7 | 0.39 (0.24, 0.55)   | 4.89 | <0.00001 | 84% | <0.00001 |  |
| <b>Treatment duration</b>                               |   |                     |      |          |     |          |  |
| ≥8 weeks                                                | 7 | 0.39 (0.24, 0.54)   | 5.06 | <0.00001 | 78% | 0.0001   |  |
| <8 weeks                                                | 3 | 0.45 (0.09, 0.82)   | 2.45 | 0.01     | 90% | <0.0001  |  |

**Note:** ORR: objective response rate, DCR: disease control rate, QOL: quality of life, CI: confidence interval, OXA: oxaliplatin, DDP: cisplatin.
